# Supplementary material for: Mouse models of Japanese encephalitis virus infection: A systematic review and meta-analysis using a meta-regression approach
Source: PubMed Central journal article supplement (PMC8865681; doi:10.1371/journal.pntd.0010116), 2022-02-10
Supplement: pntd.0010116.s010.pdf [file pntd.0010116.s010.pdf]

# PLOS Neglected Tropical Diseases

## Mouse models of Japanese encephalitis virus infection: a systematic review and meta-analysis using a meta-regression approach

--Manuscript Draft--

|                                                      |                                                                                                                                                                                                                                                                                                                                                                                                                                                                                                                                                                                                                                                                                                                                                                                                            |
|------------------------------------------------------|------------------------------------------------------------------------------------------------------------------------------------------------------------------------------------------------------------------------------------------------------------------------------------------------------------------------------------------------------------------------------------------------------------------------------------------------------------------------------------------------------------------------------------------------------------------------------------------------------------------------------------------------------------------------------------------------------------------------------------------------------------------------------------------------------------|
| <b>Manuscript Number:</b>                            | PNTD-D-21-01120                                                                                                                                                                                                                                                                                                                                                                                                                                                                                                                                                                                                                                                                                                                                                                                            |
| <b>Full Title:</b>                                   | Mouse models of Japanese encephalitis virus infection: a systematic review and meta-analysis using a meta-regression approach                                                                                                                                                                                                                                                                                                                                                                                                                                                                                                                                                                                                                                                                              |
| <b>Short Title:</b>                                  | Mouse models of Japanese encephalitis virus infection                                                                                                                                                                                                                                                                                                                                                                                                                                                                                                                                                                                                                                                                                                                                                      |
| <b>Article Type:</b>                                 | Research Article                                                                                                                                                                                                                                                                                                                                                                                                                                                                                                                                                                                                                                                                                                                                                                                           |
| <b>Keywords:</b>                                     | Animal models, systematic review, meta-analysis, metaregression, japanese encephalitis virus, flavivirus, neurological infection.                                                                                                                                                                                                                                                                                                                                                                                                                                                                                                                                                                                                                                                                          |
| <b>Corresponding Author:</b>                         | Lance Turtle<br>University of Liverpool<br>Liverpool, UNITED KINGDOM                                                                                                                                                                                                                                                                                                                                                                                                                                                                                                                                                                                                                                                                                                                                       |
| <b>Corresponding Author Secondary Information:</b>   |                                                                                                                                                                                                                                                                                                                                                                                                                                                                                                                                                                                                                                                                                                                                                                                                            |
| <b>Corresponding Author's Institution:</b>           | University of Liverpool                                                                                                                                                                                                                                                                                                                                                                                                                                                                                                                                                                                                                                                                                                                                                                                    |
| <b>Corresponding Author's Secondary Institution:</b> |                                                                                                                                                                                                                                                                                                                                                                                                                                                                                                                                                                                                                                                                                                                                                                                                            |
| <b>First Author:</b>                                 | Tehmina Bharucha, BSc MSc MBChB MRCP DTM&H                                                                                                                                                                                                                                                                                                                                                                                                                                                                                                                                                                                                                                                                                                                                                                 |
| <b>First Author Secondary Information:</b>           |                                                                                                                                                                                                                                                                                                                                                                                                                                                                                                                                                                                                                                                                                                                                                                                                            |
| <b>Order of Authors:</b>                             | Tehmina Bharucha, BSc MSc MBChB MRCP DTM&H<br>Ben Cleary<br>Alice Farmiloe<br>Elizabeth Sutton<br>Hanifah Hayati<br>Peggy Kirkwood<br>Layal Al Hamed<br>Nadja van Ginneken<br>Krishanthi Subramaniam<br>Nicole Zitzmann<br>Gerry Davies<br>Lance Turtle                                                                                                                                                                                                                                                                                                                                                                                                                                                                                                                                                    |
| <b>Order of Authors Secondary Information:</b>       |                                                                                                                                                                                                                                                                                                                                                                                                                                                                                                                                                                                                                                                                                                                                                                                                            |
| <b>Abstract:</b>                                     | <p><b>Background:</b><br/>Japanese encephalitis (JE) virus (JEV) remains a leading cause of neurological infection across Asia. The high lethality of disease and absence of effective therapies mean that standardised animal models will be crucial in developing therapeutics. However, published mouse models are heterogeneous. We performed a systematic review, meta-analysis and meta-regression of published JEV mouse experiments, to investigate the variation in model parameters, assess homogeneity, and test the relationship of key variables against mortality.</p> <p><b>Methodology/ Principal Findings:</b><br/>A PubMed search was performed up to August 2020. 1991 publications were identified, of which 127 met inclusion criteria, with data for 5026 individual mice across</p> |

|                                                                                                                                                                                                                                                                                                                                                                                                                                                                                                      |                                                                                                                                                                                                                                                                                                                                                                                                                                                                                                                                                                                                                                                                                                                                                                                                                                                                                                                                                                                                                                                                                                                                                                                                                                                                |
|------------------------------------------------------------------------------------------------------------------------------------------------------------------------------------------------------------------------------------------------------------------------------------------------------------------------------------------------------------------------------------------------------------------------------------------------------------------------------------------------------|----------------------------------------------------------------------------------------------------------------------------------------------------------------------------------------------------------------------------------------------------------------------------------------------------------------------------------------------------------------------------------------------------------------------------------------------------------------------------------------------------------------------------------------------------------------------------------------------------------------------------------------------------------------------------------------------------------------------------------------------------------------------------------------------------------------------------------------------------------------------------------------------------------------------------------------------------------------------------------------------------------------------------------------------------------------------------------------------------------------------------------------------------------------------------------------------------------------------------------------------------------------|
|                                                                                                                                                                                                                                                                                                                                                                                                                                                                                                      | <p>487 experimental groups. Quality assessment was performed using a modified CAMRADES criteria, and demonstrated incomplete reporting, with a median quality score of 10/17. The pooled estimate of mortality in mice after JEV challenge was 64.7% (95% confidence interval 60.9 to 68.3) with substantial heterogeneity between experimental groups (<math>I^2</math> 70.1%, df 486). Using meta-regression to identify key moderators, a refined dataset was used to model outcome dependent on five variables: mouse age, virus strain, virus dose (in log<sub>10</sub> PFU) and route of inoculation. The final model reduced the heterogeneity substantially (<math>I^2</math> 37.8%, df 241), explaining 54% of the variability.</p> <p>Conclusion/ Significance:<br/>This is the first systematic review of mouse models of JEV infection. Better adherence to CAMRADES guidelines may reduce bias and variability of reporting. In particular, sample size calculations were notably absent. We report that mouse strain, age, virus strain, dose and route of inoculation account for much, though not all, of the variation in mortality. This dataset is available for researchers to access and use as a guideline for JEV mouse experiments</p> |
| <p><b>Suggested Reviewers:</b></p>                                                                                                                                                                                                                                                                                                                                                                                                                                                                   | <p>Mario Lobigs<br/>The University of Queensland - Saint Lucia Campus: The University of Queensland<br/>m.lobigs@uq.edu.au</p> <p>Eiji Konishi<br/>Mahidol University<br/>ekon@biken.osaka-u.ac.jp</p> <p>Seong Kug Eo<br/>Chonbuk National University: Jeonbuk National University<br/>vetvirus@chonbuk.ac.kr</p> <p>Emily Sena<br/>The University of Edinburgh<br/>emily.sena@ed.ac.uk</p>                                                                                                                                                                                                                                                                                                                                                                                                                                                                                                                                                                                                                                                                                                                                                                                                                                                                   |
| <p><b>Opposed Reviewers:</b></p>                                                                                                                                                                                                                                                                                                                                                                                                                                                                     |                                                                                                                                                                                                                                                                                                                                                                                                                                                                                                                                                                                                                                                                                                                                                                                                                                                                                                                                                                                                                                                                                                                                                                                                                                                                |
| <p><b>Additional Information:</b></p>                                                                                                                                                                                                                                                                                                                                                                                                                                                                |                                                                                                                                                                                                                                                                                                                                                                                                                                                                                                                                                                                                                                                                                                                                                                                                                                                                                                                                                                                                                                                                                                                                                                                                                                                                |
| <p><b>Question</b></p>                                                                                                                                                                                                                                                                                                                                                                                                                                                                               | <p><b>Response</b></p>                                                                                                                                                                                                                                                                                                                                                                                                                                                                                                                                                                                                                                                                                                                                                                                                                                                                                                                                                                                                                                                                                                                                                                                                                                         |
| <p><b>Financial Disclosure</b></p> <p>Enter a financial disclosure statement that describes the sources of funding for the work included in this submission. Review the <a href="#">submission guidelines</a> for detailed requirements. View published research articles from <a href="#">PLOS NTDs</a> for specific examples.</p> <p>This statement is required for submission and <b>will appear in the published article</b> if the submission is accepted. Please make sure it is accurate.</p> | <p>TB is supported by the University of Oxford and the Medical Research Council [grant number MR/N013468/1]. LT is a Wellcome clinical career development fellow, supported by grant number 205228/Z/16/Z, and the NIHR Health Protection Research Unit in emerging and zoonotic infections (NIHR200907) at University of Liverpool in partnership with Public Health England (PHE), in collaboration with Liverpool School of Tropical Medicine and the University of Oxford. LT is based at University of Liverpool. The views expressed are those of the author(s) and not necessarily those of the NHS, the NIHR, the Department of Health or Public Health England. NZ is supported by the Oxford Glycobiology endowment. The funders had no role in study design, data collection and analysis, decision to publish, or preparation of the manuscript.</p>                                                                                                                                                                                                                                                                                                                                                                                               |

### Unfunded studies

Enter: *The author(s) received no specific funding for this work.*

### Funded studies

Enter a statement with the following details:

- Initials of the authors who received each award
- Grant numbers awarded to each author
- The full name of each funder
- URL of each funder website
- Did the sponsors or funders play any role in the study design, data collection and analysis, decision to publish, or preparation of the manuscript?
- **NO** - Include this sentence at the end of your statement: *The funders had no role in study design, data collection and analysis, decision to publish, or preparation of the manuscript.*
- **YES** - Specify the role(s) played.

\* typeset

### Competing Interests

Use the instructions below to enter a competing interest statement for this submission. On behalf of all authors, disclose any [competing interests](#) that could be perceived to bias this work—acknowledging all financial support and any other relevant financial or non-financial competing interests.

This statement **will appear in the published article** if the submission is accepted. Please make sure it is accurate. View published research articles from [PLOS NTDs](#) for specific examples.

The authors have declared that no competing interests exist.

**NO authors have competing interests**

Enter: *The authors have declared that no competing interests exist.*

**Authors with competing interests**

Enter competing interest details beginning with this statement:

*I have read the journal's policy and the authors of this manuscript have the following competing interests: [insert competing interests here]*

\* typeset

This statement is **required** for submission and **will appear in the published article** if the submission is accepted. Please make sure it is accurate and that any funding sources listed in your Funding Information later in the submission form are also declared in your Financial Disclosure statement.

**Data Availability**

Authors are required to make all data underlying the findings described fully available, without restriction, and from the time of publication. PLOS allows rare exceptions to address legal and ethical concerns. See the [PLOS Data Policy](#) and [FAQ](#) for detailed information.

Yes - all data are fully available without restriction

A Data Availability Statement describing where the data can be found is required at submission. Your answers to this question constitute the Data Availability Statement and **will be published in the article**, if accepted.

**Important:** Stating 'data available on request from the author' is not sufficient. If your data are only available upon request, select 'No' for the first question and explain your exceptional situation in the text box.

Do the authors confirm that all data underlying the findings described in their manuscript are fully available without restriction?

**Describe where the data may be found in full sentences. If you are copying our sample text, replace any instances of XXX with the appropriate details.**

- If the data are **held or will be held in a public repository**, include URLs, accession numbers or DOIs. If this information will only be available after acceptance, indicate this by ticking the box below. For example: *All XXX files are available from the XXX database (accession number(s) XXX, XXX).*
- If the data are all contained **within the manuscript and/or Supporting Information files**, enter the following: *All relevant data are within the manuscript and its Supporting Information files.*
- If neither of these applies but you are able to provide **details of access elsewhere**, with or without limitations, please do so. For example:

*Data cannot be shared publicly because*

Data are available as supplemental information

of [XXX]. Data are available from the XXX Institutional Data Access / Ethics Committee (contact via XXX) for researchers who meet the criteria for access to confidential data.

The data underlying the results presented in the study are available from (include the name of the third party and contact information or URL).

- This text is appropriate if the data are owned by a third party and authors do not have permission to share the data.

\* typeset

Additional data availability information:

To the Editor,

Plos NTD

July 2021

To the Editors,

**Re: Mouse models of Japanese encephalitis virus infection: a systematic review and meta-analysis using a meta-regression approach**

We would be grateful if you could consider our submission describing a systematic review and meta-analysis of mice models of Japanese encephalitis virus.

Japanese encephalitis (JE) is a devastating disease, with no promising antiviral candidate therapies. Treatment trials that have been conducted were only powered to detect very large treatment effects. There are still around 100,000 cases per year despite the availability of vaccines. In order to have any hope of developing new treatments, standardised animal models will be needed. However, mouse models of JE are variable in their characteristics, with many contradictory findings in the literature. For this reason, we performed a systematic review, meta-analysis and meta-regression of published JEV mouse experiments, to investigate the variation in model parameters, assess homogeneity, and test the relationship of key variables against mortality.

This is the first report, we are aware of, of a systematic review and meta-analysis of mouse models of JE. We demonstrate an abundance of experimental work in this field. However, reporting was frequently incomplete and there was considerable variability in outcomes. We provide recommendations for researchers to improve standardisation of study design and reporting of studies. Furthermore, all the data have been provided in supporting files.

Please let us know if you need further information.

Kind regards,

The Authors

Corresponding author - Dr Lance Turtle. Email: [lance.turtle@liverpool.ac.uk](mailto:lance.turtle@liverpool.ac.uk). Address:  
Institute of Infection, Veterinary and Ecological Sciences, Faculty of Health and Life  
Sciences, University of Liverpool, Liverpool, UK.



1 **Full title:** Mouse models of Japanese encephalitis virus infection: a  
2 systematic review and meta-analysis using a meta-regression approach

3

4 **Short title:** Mouse models of Japanese encephalitis virus infection

5

6 **Authors and Affiliations:**

7 Tehmina Bharucha<sup>1,2+</sup>

8 Ben Cleary<sup>3+</sup>

9 Alice Farmiloe<sup>3</sup>

10 Elizabeth Sutton<sup>3</sup>

11 Hanifah Hayati<sup>6</sup>

12 Peggy Kirkwood<sup>3</sup>

13 Layal Al Hamed<sup>3</sup>

14 Nadja van Ginneken<sup>4</sup>

15 Krishanthi Subramaniam<sup>3</sup>

16 Nicole Zitzmann<sup>1</sup>

17 Gerry Davies<sup>3,5</sup>

18 Lance Turtle<sup>\*3,5</sup>

19

- 20 1. Oxford Glycobiology Institute, Department of Biochemistry, University  
21 of Oxford, Oxford, UK.
- 22 2. Lao-Oxford-Mahosot Hospital-Wellcome Trust Research Unit  
23 (LOMWRU), Microbiology Laboratory, Mahosot Hospital, Vientiane,  
24 Lao PDR
- 25 3. Institute of Infection, Veterinary and Ecological Sciences, Faculty of  
26 Health and Life Sciences, University of Liverpool, Liverpool, UK.
- 27 4. Department of Primary Care and Mental Health, University of  
28 Liverpool, Liverpool, UK.
- 29 5. Tropical and Infectious Disease Unit, Liverpool University Hospitals  
30 NHS Foundation Trust (member of Liverpool Health Partners),  
31 Liverpool, UK.
- 32 6. Department of Neurology, Faculty of Medicine, Gadjah Mada  
33 University, Dr Sardjito Hospital, Yogyakarta, Indonesia

34 <sup>†</sup>Joint first author

35 <sup>\*</sup>Corresponding author [lance.turtle@liverpool.ac.uk](mailto:lance.turtle@liverpool.ac.uk)

36

37 **Author emails**

38 [t.bharucha@doctors.org.uk](mailto:t.bharucha@doctors.org.uk)

39 [bencleary94@gmail.com](mailto:bencleary94@gmail.com)

- 40 [alice.farmiloe@hotmail.co.uk](mailto:alice.farmiloe@hotmail.co.uk)
- 41 [esutton@liverpool.ac.uk](mailto:esutton@liverpool.ac.uk)
- 42 [hanifahfh@gmail.com](mailto:hanifahfh@gmail.com)
- 43 [peggykirkwood@hotmail.com](mailto:peggykirkwood@hotmail.com)
- 44 [L.alhamed@hotmail.com](mailto:L.alhamed@hotmail.com)
- 45 [nadjavg@liverpool.ac.uk](mailto:nadjavg@liverpool.ac.uk) ORCID ID: 0000-0002-4843-2617
- 46 [K.Subramaniam@liverpool.ac.uk](mailto:K.Subramaniam@liverpool.ac.uk) ORCID ID: 0000-0002-1734-9351
- 47 [nicole.zitzmann@bioch.ox.ac.uk](mailto:nicole.zitzmann@bioch.ox.ac.uk)
- 48 [gerrydavies@doctors.org.uk](mailto:gerrydavies@doctors.org.uk)
- 49 [lance.turtle@liverpool.ac.uk](mailto:lance.turtle@liverpool.ac.uk)

50 **Abstract**

51

52 Background:

53 Japanese encephalitis (JE) virus (JEV) remains a leading cause of neurological infection  
54 across Asia. The high lethality of disease and absence of effective therapies mean that  
55 standardised animal models will be crucial in developing therapeutics. However,  
56 published mouse models are heterogeneous. We performed a systematic review, meta-  
57 analysis and meta-regression of published JEV mouse experiments to investigate the  
58 variation in model parameters, assess homogeneity and test the relationship of key  
59 variables against mortality.

60

61 Methodology/ Principal Findings:

62 A PubMed search was performed up to August 2020. 1991 publications were identified,  
63 of which 127 met inclusion criteria, with data for 5026 individual mice across 487  
64 experimental groups. Quality assessment was performed using a modified CAMARADES  
65 criteria and demonstrated incomplete reporting with a median quality score of 10/17. The  
66 pooled estimate of mortality in mice after JEV challenge was 64.7% (95% confidence  
67 interval 60.9 to 68.3) with substantial heterogeneity between experimental groups ( $I^2$   
68 70.1%, df 486). Using meta-regression to identify key moderators, a refined dataset was  
69 used to model outcome dependent on five variables: mouse age, mouse strain, virus  
70 strain, virus dose (in  $\log_{10}$ PFU) and route of inoculation. The final model reduced the  
71 heterogeneity substantially ( $I^2$  37.8%, df 241), explaining 54% of the variability.

72

73 Conclusion/ Significance:

74 This is the first systematic review of mouse models of JEV infection. Better adherence to  
75 CAMARADES guidelines may reduce bias and variability of reporting. In particular,  
76 sample size calculations were notably absent. We report that mouse age, mouse strain,  
77 virus strain, virus dose and route of inoculation account for much, though not all, of the  
78 variation in mortality. This dataset is available for researchers to access and use as a  
79 guideline for JEV mouse experiments.

80 **Author Summary**

81

82 Japanese encephalitis (JE) virus (JEV) remains a leading cause of brain infection across  
83 Asia, resulting in considerable death and disability. No effective treatment exists. Mouse  
84 models are fundamental to evaluate novel treatments. We aimed to perform the first  
85 systematic literature review and data synthesis of JEV infection in mouse models.

86

87 We identified an abundance of experimental data in the field, with 127 studies meeting  
88 the inclusion criteria involving a total of 5026 individual mice. Overall, 65% of mice died  
89 after JEV infection. However there was incomplete reporting in publications and  
90 considerable variability in the results.

91

92 In summary, the findings support the ongoing use of mouse models of JEV infection and  
93 inform researchers in the field in refining their experiments. Key factors affecting variation  
94 in mortality across studies that need to be carefully considered in study design are mouse  
95 age, mouse strain, virus strain, virus dose and route of inoculation. We highlight the need  
96 for researchers to adhere to reporting guidelines in preparing manuscripts for publication.

97 **Introduction**

98

99 Japanese encephalitis (JE) virus (JEV) remains a leading cause of neurological infection  
100 across Asia (1, 2). The single stranded, positive sense RNA virus is a member of the  
101 genus *Flavivirus*, and groups into five genotypes (I-V) based on genomic sequence, with  
102 human infections primarily caused by genotypes I and III (3). JEV transmission occurs in  
103 enzootic cycles between mosquitoes, pigs and birds, with human infection arising  
104 primarily from infected *Culex* spp. mosquitoes (4). There are an estimated 100,000 cases  
105 of JEV infection per annum (5), with recent dynamic modelling suggesting that in 2021  
106 there will be 23,600 deaths and a loss of 2,500,000 disability adjusted life years (5, 6).  
107 Moreover, JE predominantly affects children in endemic areas and has devastating  
108 socioeconomic consequences.

109

110 A handful of randomised clinical trials of treatments for JE have been performed to date,  
111 however no effective treatment has been identified (7). Multiple vaccines exist and are  
112 recommended by the World Health Organisation (WHO) (8). Although recent efforts have  
113 strengthened JE vaccination programs, still only 12 of 24 endemic countries include JE  
114 vaccine in routine immunisation policies; even then, it is not uniformly nationwide, with  
115 vaccine coverage in targeted areas reported to be as low as 39% (1). As viremia in JE is  
116 too low to propagate, humans are considered dead-end hosts and the infection is  
117 zoonotic, which provides additional challenges as vaccination alone is therefore not  
118 sufficient for JE eradication (4).

119

120 The high lethality of JE and absence of effective therapies mean that animal models are  
121 crucial in developing our understanding of the disease and therapeutic prospects. There  
122 have been reports published of experiments using JEV in mouse models dating back to  
123 1935 when the virus was first isolated (9, 10). Mice are frequently the preferred model for  
124 studying human infections due to their low-cost, timely reproduction and variability (11).  
125 In the last decade, many studies of JEV have used animal models to address a wide  
126 variety of different questions, such as the role of various components of the immune  
127 system in protection from JEV, pathogenesis of JE and for testing treatments. These  
128 studies have contributed greatly towards further understanding JE pathogenesis (7).  
129 However, mouse models of JE have not been standardised and can be highly variable  
130 across laboratories contributing to contradictory results (12).

131

132 No systematic review of mouse models of JE has been conducted. Therefore, in order to  
133 understand which model parameters account for variation, and to ensure homogeneous  
134 reporting of results, we conducted a systematic review of published experiments using  
135 JEV in mouse models. We hypothesised that virus strain, virus dose, route of  
136 administration, mouse strain, mouse age and mouse sex would influence lethality. We  
137 therefore aimed to test the relationship of these variables on mortality from JEV infection  
138 in mice and to develop guidance on the set up and reporting of mouse models of JE.



139 **Methods**

140

141 The study adhered to PRISMA guidelines for systematic reviews and the protocol is  
142 included in supplementary data (S1\_Data). A PubMed search was performed using the  
143 terms ("encephalitis, japanese"[MeSH Terms] OR ("encephalitis"[All Fields] AND  
144 "japanese"[All Fields]) OR "japanese encephalitis"[All Fields] OR ("japanese"[All Fields]  
145 AND "encephalitis"[All Fields]) OR "je"[All Fields] OR "jev"[All Fields]) AND ("mice"[MeSH  
146 Terms] OR "mice"[All Fields] OR "mouse"[All Fields] OR "mice"[MeSH Terms] OR  
147 "mice"[All Fields] OR "mus"[All Fields]). The search date ranged from 1935 (the year of  
148 first isolation of JEV) to August 2020 and only English language text was included.  
149 Retrieved references were downloaded into EndNote for the removal of duplicate studies  
150 and the abstracts and/or full-text screened by two authors independently for eligibility as  
151 per the criteria detailed below, see Figure 1 for the PRISMA flow diagram.

152 The inclusion criteria were any publication that included an experiment meeting the  
153 following criteria: 1. JEV was inoculated into mice; 2. virus dose was reported; 3. JEV  
154 strain or source was reported; 4. immunocompetent mice were used and the strain was  
155 reported; 5. mortality was reported as either death or humane endpoint (primary  
156 analysis & outcome measures, secondary outcome measures 1 and 2) or other  
157 pathological outcome reported (secondary outcome 3); 6. published in English; and 7.  
158 primary research. Additional data were also extracted (see S1\_Data) but did not serve  
159 as an exclusion from the primary analysis. Studies were excluded if they reported  
160 inoculation using non-pathogenic JEV (for example the vaccine strain SA14-14-2) only,  
161 or if data on individual animals was not reported and it was not possible to extract the

162 data. In order to minimise non-specific immune effects, data were collected only on  
163 groups of mice that received JEV only, and no other material. For example, data were  
164 frequently derived from reports that tested a treatment or vaccine, in these cases only  
165 the control group was extracted.

166 Quality assessment and data extraction were performed by two authors independently,  
167 using standardised excel sheet proformas. The quality of studies was assessed based on  
168 ten standard quality measures used previously for animal model meta-analyses by  
169 CAMARADES (the Collaborative Approach to Meta-Analysis and Review of Animal Data  
170 in Experimental Studies) (12). Additional data extracted as study quality measures were:  
171 statement of the intent of the experiments conducted, mouse strain used, virus used, dose  
172 of virus given, route of inoculation given, age of mice at inoculation explicitly stated or  
173 easily calculated (e.g., “mice were immunised at 6 weeks of age ... and challenged 2  
174 weeks after immunisation”) and cell type/tissue that the virus was derived from. Each  
175 study was allocated a **score** out of 17 based on these quality measures.

176 Data were analysed using R version 4.0.2 (13). Variables of interest were plotted against  
177 mortality at the level of individual experiments. Publication bias was explored using funnel  
178 plots. Individual and aggregated forest plots were used to summarise data, stratified by  
179 key variables. Meta-regression was used to quantify the impact of experiment-level  
180 covariates on heterogeneity of outcomes. The generalised  $R^2$  (explained variance) and  $I^2$   
181 (total heterogeneity/variability) statistics, likelihood ratio test, and Akaike's Information  
182 Criterion (AIC) were used to judge model fit. Routine regression diagnostics were used to  
183 test model assumptions. A multivariable analysis was performed using all of the variables  
184 in a single model to estimate mortality. Sensitivity analyses were used to consider the

- 185 strength of effect of each variable individually using a forward stepwise approach, i.e.
- 186 assessing the iterative effect of including them in the model.

187 **Results**

188

189

190 Summary

191

192 The initial search identified 1991 articles, of which 127 were included in the review,  
193 detailed in the PRISMA flow diagram (Figure 1). Data were available on 5026 individual  
194 mice in 487 experimental groups challenged with JEV. Studies involved a median of two  
195 (IQR 1-4; range 1-84) groups where JEV was inoculated into mice with no other treatment  
196 or substance; one study performed by Miura *et al.* in 1988 (14) represented an outlier  
197 with 84 groups involving a total of 527 mice. Experimental groups included a median of  
198 10 (IQR 5-12; range 2-112) mice; 18 (3.7%) with over 20 mice, and two (0.4%) with over  
199 50 mice. No study performed in the last 5 years included an experimental group with over  
200 20 mice. Between 1970 and 2020 studies were conducted in 12 countries, primarily in  
201 Asia (China, India, Japan, Republic of Korea, Singapore, Malaysia, Taiwan), but also in  
202 Australia, Europe (U.K., France, The Netherlands) and N. America (U.S.A.) (S6\_Figure  
203 and S7\_Figure). Eighty-four last authors were identified in 54 institutions, with almost half  
204 (25; 46%) of institutions publishing multiple studies.

205

206 **Figure 1:** PRISMA flow diagram of study selection

207

208 Compared with CAMARADES criteria, several pieces of information in specific areas  
209 were not reported. Less than 50% of studies included statements that allocation to  
210 experimental group was random, treatment and outcome were blinded to investigator,

211 neuroprotective anaesthesia was used and no conflict of interests were present. No study  
 212 reported having performed a sample size calculation or that the temperature was  
 213 controlled during experiments. Median quality score was 10 (IQR 9-11, range 7-13)  
 214 across the 17 criteria (figure 2). Data extracted are displayed in Table 1, with details of  
 215 the variables and missing study-level characteristics.

216

217 **Figure 2:** Quality assessment of included studies

218

219 **Table 1:** Variables with data extracted

| Variable                | Details                          | No. (%) of studies with missing data, i.e. no reporting |
|-------------------------|----------------------------------|---------------------------------------------------------|
| Year of publication     | 6 categories                     | 0 (0%)                                                  |
| Last author             | 84 categories                    | 0 (0%)                                                  |
| Institution             | 54 categories                    | 0 (0%)                                                  |
| Country                 | 12 categories                    | 0 (0%)                                                  |
| Mouse strain*           | 14 categories                    | 0 (0%)                                                  |
| Mouse age               | 4 categories                     | 2 (1.6%)                                                |
| Mouse sex               | 2 categories                     | 59 (56%)                                                |
| Virus genotype          | 3 categories                     | 0 (0%)                                                  |
| Virus strain*           | 38 categories                    | 0 (0%)                                                  |
| Virus dose in PFU*      | log <sub>10</sub> PFU continuous | 29 (22.8%)                                              |
| Route of administration | 8 categories                     | 0 (0%)                                                  |

220 \*The variable was a criteria for inclusion in the systematic review. For the purpose of meta-regression analysis, doses in tissue culture  
 221 infective dose (TCID<sub>50</sub>) were converted to plaque forming units (PFU) and doses in lethal dose (LD) were excluded.

222

223 The global estimate of mortality in mice after JEV challenge, i.e. the base meta-regression  
 224 model, was 64.7% (95% confidence interval 60.9 to 68.3). There was substantial

225 heterogeneity ( $I^2$  70.1%, df 486) between experimental groups. Therefore, we next  
226 determined the influence of key variables to develop a final meta-regression model.

227

228

229 Analysis of the moderating effect and interactions of key variables

230

231 *Mouse strain:* Fourteen different mouse strains were used in the studies, see Figure 3A.

232 Six strains were used for the vast majority (4771; 95%) of studies; C57BL/6, BALB/c,

233 Swiss, C3H/He, ICR and ddY mice. There were less than 100 mice (range 6-65) studied

234 for each of the eight remaining strains. The mortality of JEV challenge in different mouse

235 strains was highly variable (Figure 3B). Overall, BALB/c, Swiss and ICR were more

236 susceptible to JEV than other mouse strains and ddY was more resistant. Incorporating

237 mouse strain as a moderator in the base meta-regression model reduced the variability

238 of the base model ( $I^2$  63.6%, S2\_Data). Analysis of the top six mouse strains (S3\_Data)

239 suggested interactions between the variables, for example mortality in ICR mice is higher

240 than C57BL/6; however the median age of the mice used in experiments with the different

241 strains is different at 14 (IQR 3-21) vs 42 (IQR 35-95) days respectively.

242

243

244 **Figure 3A:** Summary of the number of mice of different mouse strains used; **Figure 3B:** Mortality

245 from JEV challenge in different strains of mice used

246

247

248 *Mouse age:* Mouse age was categorised into months. Mice used in JEV challenge studies  
249 were predominantly immature (3754/5025; 75%), i.e. less than 3 months old (Figure 3C).  
250 Mortality declined with the age of the mice (Figure 3D). Incorporating mouse age as a  
251 moderator in the base meta-regression model reduced the variability of the base model  
252 ( $I^2$  65.2%, S2\_Data).

253

254 **Figure 3C:** Summary of the ages of mice used; **Figure 3D** Mortality from JEV challenge in mice  
255 of different ages used

256

257

258

259

260 *Mouse sex:* Sixty-eight (54%) of studies reported the mouse sex, data were missing for  
261 2686 mice (53%). The vast majority of mice for which data were available were female  
262 (2299; 98%). Mortality in male vs. female mice following JEV challenge was not  
263 significantly different (Figure 3E). Incorporating mouse sex as a moderator in the base  
264 meta-regression model minimally reduced the variability of the base model ( $I^2$  68.7%,  
265 S2\_Data).

266

267 **Figure 3E:** Mortality from JEV challenge in male and female mice

268

269 *Virus genotype:* Three of the five known JEV genotypes were used in studies;  
270 predominantly genotype 3 (4407; 88%), to a lesser extent genotype 1 (515; 10%) and  
271 rarely genotype 5 (104; 2%). Mortality of mice challenged with different genotypes is

272 shown in Figure 3F. Incorporating virus genotype as a moderator in the base meta-  
273 regression model minimally reduced the variability of the base model ( $I^2$  69.9%), see  
274 S2\_Data.

275

276 **Figure 3F** Mortality in mice challenged with different JEV genotypes

277

278 *Virus strain:* Thirty-eight different JEV strains were used in the studies (Figure 4A); 7  
279 (18%) genotype 1, 29 (77%) genotype 3 and 2 (5%) genotype 5. Twenty of 127 studies  
280 (16%) reported accession numbers but none reported sequencing data to confirm the  
281 virus used. There were 16 strains with identifiable accession numbers, 12 full and 4 partial  
282 sequences; there did not appear to be any particular genetic selection bias given the  
283 relationship to other virus isolates on a phylogenetic tree (S4\_Figure).

284

285 **Figure 4A:** Summary of the number of mice that received different JEV strains

286

287 Ten JEV strains were used in less than 100 mice each, such that 13 JEV strains  
288 represented 4004 (80%) of the mice included in the review. The mortality of JEV challenge  
289 with different virus strains was highly variable (Figure 4B). Incorporating virus strain as a  
290 moderator in the base meta-regression model reduced the variability of the base model  
291 ( $I^2$  56.5%, S2\_Data). Analysis of the top 13 JEV strains (S5\_Data) suggested interaction  
292 between the variables, for example mice challenged with AS6 have significantly lower  
293 mortality than those challenged with Beijing1, however the median dose of AS6 is over  
294 6000 times lower than that of Beijing1.

295



296 **Figure 4B:** Mortality in mice challenged with different JEV strains

297

298 *Virus dose:* Ninety-three (73%) studies reported the dose in plaque forming units (PFU),  
299 28 (22%) in lethal dose (LD), 5 (4%) in median tissue culture infectious dose (TCID50)  
300 and 1 (1%) in median cell culture infectious dose (CCID50). TCID50 was converted to  
301 PFU ( $PFU = 0.7 \times TCID50$ ) and the analysis was performed with the virus dose in  
302  $\log_{10}PFU$ , using this approach there were missing data for 1239 (25%) mice included in  
303 the review. There was a normal distribution of doses used in the studies (Figure 5a).  
304 There was no clear relationship between dose and mortality, however performing a  
305 subgroup analysis by route did demonstrate an association, see Figures 5B and 6.  
306 Incorporating virus dose in PFU as a moderator in the base meta-regression model  
307 reduced the variability of the base model ( $I^2$  65.9%), see S2\_Data.

308

309 **Figure 5A:** Summary of the number of mice that received different doses; **Figure 5B:** Mortality in  
310 mice following JEV challenge against dose in  $\log_{10}PFU$

311

312 **Figure 6:** Mortality in mice following JEV challenge against dose in  $\log_{10}PFU$  grouped by the route  
313 of inoculation.

314

315

316 *Route of administration:* Eight routes of JEV challenge were used across the included  
317 studies; intracerebral (IC), sub-cutaneous (SC), intranasal (IN), conjunctival (CONJ),  
318 intravenous (IV), intramuscular (IM), intraperitoneal (IP) and IP with sham IC, see Figure  
319 7A. IN and CONJ were used in only 64 (1.3%) and 10 (0.2%) mice respectively. There

320 was no significant difference in mortality in mice challenged by different routes of  
321 administration, see Figure 7B. Incorporating virus dose in PFU as a moderator in the base  
322 meta-regression model minimally reduced the variability of the base model ( $I^2$  68.7%),  
323 see S2\_Data. Analysis of the top 6 routes of administration, see S8\_Data, suggests  
324 interaction between these variables.

325

326 **Figure 7A:** Summary of the number of mice that were challenged by different routes of  
327 administration; **Figure 7B:** Mortality in mice challenged by different routes of administration

328

329

### 330 **Interactions**

331 Analysis was performed to examine interactions of key variables. There were no clearly  
332 identifiable interactions. This was in part due to a lack of data for all the categories; for  
333 example, as seen in Figure 8, investigators use mice of the same age for specific mouse  
334 strains.

335

336 **Figure 8:** Boxplot of the distribution of ages of mice across mice strains used in the included  
337 studies

338

339

### 340 Meta-regression analysis

341

342 In order to reduce instability in the model due to missing study-level characteristics and  
343 to better explore interactions between the variables, a sub-group analysis was performed

344 using the top six mouse strains, top 13 virus strains and top six routes of inoculation. The  
345 reduced dataset included 242 (49.7%) of the experimental groups and 2562 (51.0%) of  
346 the mice in the full dataset. The pooled estimate of mortality in mice after JEV challenge,  
347 i.e. the base meta-regression model for the reduced dataset was 64.3 (95% confidence  
348 interval 58.9 to 69.4, Figure 9). There was substantial heterogeneity ( $I^2$  70.0%, df 241)  
349 between experimental groups. In view of the analysis results of the key variables and  
350 biological plausibility of their role in moderating the effect, the final model using the  
351 reduced dataset included the top six mouse strains, mouse age in months, 13 most  
352 frequently used virus strains, virus dose in PFU and the six commonest routes of  
353 administration. The final model reduced the heterogeneity substantially ( $I^2$  37.8%, df  
354 241). This confirmed our starting hypothesis that mouse strain, mouse age, route of  
355 administration, virus dose and virus strain account for much of the variation in mortality in  
356 mouse models of JE.

357

358 **Figure 9:** Forest plot of the studies included in the final meta-regression model

359 **Discussion**

360

361 The results highlight the wealth of data available on mouse models of JE, with 127 studies  
362 meeting the eligibility criteria for inclusion, totalling 5026 mice in 487 experimental groups.  
363 The pooled estimate for mortality was 64.7% (95% confidence interval 60.9 to 68.3%).  
364 Mouse strain, mouse age, route of administration, virus dose and virus strain account for  
365 much of the variation in mortality in mouse models of JE. The large number of mice  
366 studied to date, the significant unresolved heterogeneity across studies and the ongoing  
367 knowledge gaps in our understanding of JE (particularly the lack of effective treatment)  
368 underlines the importance of this systematic review to inform future research. In  
369 particular, the analysis aims to refine future mouse models of JEV infection, to improve  
370 the quality of future studies and reduce unnecessary replication. The extracted data has  
371 been made publicly available to enable researchers to perform their own analysis.

372

373 Quality assessment was relatively low with a median quality score of 10 (IQR 9-11, range  
374 7-13) across the 17 criteria. However, there was an improvement in the score over time.  
375 This highlights the need to reduce risk of bias through detailed reporting, following  
376 CAMARADES guidelines. In particular, there is a need for performance and reporting of  
377 blinding, randomisation and *a priori* sample size calculations. None of the studies were  
378 excluded based on these quality assessments. Beyond the quality assessment criteria,  
379 analysis of data extracted demonstrated missing data for study-level characteristics, most  
380 strikingly for reporting of mouse sex in 59 (56%) studies. Furthermore, accession  
381 numbers were only reported in 20 (16%) studies with no study reporting sequencing of

382 the actual JEV strain used, which is important given the potential for sequence variability  
383 after serial passage in culture.

384 The number of mice per experimental group has become more consistent with time, as  
385 researchers are more aware of the need to reduce unnecessary waste. Nonetheless, it is  
386 always a balance between sufficient power versus minimising numbers used/ sacrificed.  
387 In mouse experiments, it is typical to use 5 mice for inbred strains and 8-10 for the  
388 outbred, however based on our findings, a power calculation suggests that larger  
389 numbers are needed. For example, to detect a halving of mortality from an intervention in  
390 experiments of this kind with an overall mortality of 64.7%, 35 mice are needed per group  
391 to give 80% power at the 5% significance level.

392

393 Analysis of moderating effect of key variables

394 *Mouse strain:* Unsurprisingly, C57BL/6 (black inbred strain; 1637 - 33%) and  
395 BALB/c (white inbred strain; 1409 – 28%) were the most common strains used;  
396 these are well-characterised, reproducible, easily available and cheap (15).  
397 C57BL/6 mice have a tendency to generate Th-1 immune responses, whereas  
398 BALB/c are skewed towards Th-2 responses. Furthermore, the data were  
399 consistent with existing dogma that BALB/c are more susceptible to infection than  
400 C57BL/6, with median survival (IQR) 0% (0-30) and 50% (17-80) respectively.  
401 Although the analysis was restricted to six strains with more than 100 mice in each  
402 group (C57BL/6, BALB/c, Swiss, C3H/He, ICR and ddY mice; 4771- 95%), all were  
403 susceptible to JEV infection. It was not possible to resolve individual mouse

404 strains, as there is significant variation even between sub-strains based on  
405 breeding history, original parent strains, and source locations (18).

406 *Mouse age:* JEV predominantly affects children in endemic areas, which most  
407 likely reflects early life exposure leading to immunity by adulthood (16), though  
408 adults are also susceptible to JE upon first exposure (17). The blood brain barrier  
409 matures with age; to what extent this is relevant to human disease is not clear, but  
410 in mice this is clearly relevant, with some investigators using a sham IC injection  
411 in order to disrupt the blood brain barrier and allow encephalitis to develop (18).  
412 The systematic review provides support for this, as mortality reduced with age.

413 *Virus strain:* Variation of the virus is a plausible explanation for variation between  
414 models. Genotype 3 (G3) JEV remains the most commonly isolated JEV genotype  
415 from human cases; accepting that virus isolation from cases is a rare event and is  
416 also the most frequently used in mouse models of JEV infection (19). Many  
417 different strains of JEV have also been used in mouse models. These are rarely  
418 sequenced by the investigators, meaning it was not possible to compare  
419 sequences and/or resolve the strains used. The top 13 virus strains, relatively well-  
420 characterised sequences, constituted 80% of all mice included in the systematic  
421 review, and the viral strain accounted for 14% of the variability of the models.

422 *Virus dose:* Although the ideal reporting of virus dose is in quantified infectious  
423 units, or PFU, many papers do not use this measure and instead report the TCID50  
424 or LD50. Genome copies measured by RT-qPCR may also serve as a measure of  
425 viral inoculum, though in practice this is rarely used. TCID50 is a direct measure  
426 of infectivity and can be used to approximate PFU whereas LD50 is confounded

427 by being influenced by the outcome variable in our analysis and cannot be  
428 approximated in this way. For this reason there were significant missing data (1239  
429 - 25% mice). Nonetheless, in view of the biological plausibility of the moderating  
430 effect of dose, the dose in  $\log_{10}$ PFU was included in the final model.

431 *Route of inoculation:* The preferred route of inoculation involves the one with the  
432 best external validity, that which is technically straightforward to perform safely  
433 with a hazard group 3 virus such as JEV and provides a robust and reproducible  
434 infection. The IP method was most widely used (2811 – 56% mice), followed by IC  
435 (924 -18% mice) and then SC (539 – 11%). The meta-regression analysis showed  
436 a minimal impact of the route of inoculation on reducing heterogeneity, however  
437 further exploration demonstrated that this was due to interaction of other variables.  
438 It was notable that there was an association between the proximity of the route of  
439 inoculation to the brain and mortality ( $p$  value < 0.001).

440 A refined dataset of 2562 mice was produced and a final meta-regression model run using  
441 mouse age, mouse strain, virus strain, virus dose in  $\log_{10}$ PFU and route of inoculation.  
442 The final model reduced the heterogeneity substantially ( $I^2$  37.8%, df 241) such that  
443 54% of the variability was explained. Despite this analysis, nearly half of the variability in  
444 mouse models of JE remained unexplained, leaving significant room for variation due to  
445 individual laboratories, and therefore also room for improvement in standardisation of  
446 these important and useful models.

447  
448 Undoubtedly there are inherent limitations in mouse models of infectious diseases that  
449 affect the external validity of the findings. Furthermore, the missing data for combinations

450 of the different key variables reduces the internal validity. Nonetheless, this review still  
451 represents the comprehensive body of data on mouse models of JE assembled to date.  
452 We summarise our final recommendations in Table 2. Attention to performance and  
453 reporting of experiments on key factors identified in this review will reduce heterogeneity  
454 and enable standardisation of models. This is critical to enable evaluation of novel  
455 therapeutics.

456

457 **Table 2: Final recommendations**

- Power calculations are crucial to ensure that experiments are appropriately designed to detect effects of interventions
- Factors that affect variability in outcomes and need careful attention in study design include mouse strain, mouse age, virus strain, virus dose and route.
- Virus strains used in experiments need to be sequenced and the data included in publications.
- The data has been made publicly available and serves to inform future experiments in this field.

458



459 **Acknowledgments**

460 We thank Alan Barrett (The University of Texas Medical Branch) for useful discussion.

461 **References**

462

- 463 1. Heffelfinger JD, Li X, Batmunkh N, Grabovac V, Diorditsa S, Liyanage JB, et al.  
464 Japanese Encephalitis Surveillance and Immunization - Asia and Western Pacific Regions,  
465 2016. *MMWR Morb Mortal Wkly Rep.* 2017;66(22):579-83.
- 466 2. Bharucha T, Shearer FM, Vongsouvath M, Mayxay M, de Lamballerie X, Newton PN, et  
467 al. A need to raise the bar - A systematic review of temporal trends in diagnostics for Japanese  
468 encephalitis virus infection, and perspectives for future research. *Int J Infect Dis.* 2020.
- 469 3. Knipe DM, Howley P. *Fields Virology.* Philadelphia, UNITED STATES: Wolters Kluwer  
470 Health; 2013.
- 471 4. Pearce JC, Learoyd TP, Langendorf BJ, Logan JG. Japanese encephalitis: the vectors,  
472 ecology and potential for expansion. *J Travel Med.* 2018;25(suppl\_1):S16-S26.
- 473 5. Quan TM, Thao TTN, Duy NM, Nhat TM, Clapham H. Estimates of the global burden of  
474 Japanese encephalitis and the impact of vaccination from 2000-2015. *eLife.* 2020;9:e51027.
- 475 6. Li X, Mukandavire C, Cucunubá ZM, Echeverria Londono S, Abbas K, Clapham HE, et  
476 al. Estimating the health impact of vaccination against ten pathogens in 98 low-income and  
477 middle-income countries from 2000 to 2030: a modelling study. *The Lancet.*  
478 2021;397(10272):398-408.
- 479 7. Turtle L, Solomon T. Japanese encephalitis — the prospects for new treatments. *Nature*  
480 *Reviews Neurology.* 2018;14:298.
- 481 8. Who. Japanese Encephalitis Vaccines: WHO position paper, February 2015-  
482 Recommendations. *Vaccine.* 2016;34(3):302-3.
- 483 9. Webster LT. JAPANESE B ENCEPHALITIS VIRUS: ITS DIFFERENTIATION FROM ST.  
484 LOUIS ENCEPHALITIS VIRUS AND RELATIONSHIP TO LOUPING ILL VIRUS. *J Exp Med.*  
485 1938;67(4):609-18.
- 486 10. Hayashi M. Übertragung des Virus von Encephalitis epidemica japonica auf Affen\*.  
487 *Psychiatry and Clinical Neurosciences.* 1933;1(1):419-65.
- 488 11. Buer J, Balling R. Mice, microbes and models of infection. *Nature Reviews Genetics.*  
489 2003;4(3):195-205.
- 490 12. Ritskes-Hoitinga M, Leenaars M, Avey M, Rovers M, Scholten R. Systematic reviews of  
491 preclinical animal studies can make significant contributions to health care and more  
492 transparent translational medicine. *Cochrane Database of Systematic Reviews.* 2014(3).
- 493 13. Team RC. R: A language and environment for statistical computing. In: *Computing RfFS,*  
494 , editors. Vienna, Austria.2020.
- 495 14. Miura K, Goto N, Suzuki H, Fujisaki Y. Strain difference of mouse in susceptibility to  
496 Japanese encephalitis virus infection. *Jikken dobutsu Experimental animals.* 1988;37(4):365-73.
- 497 15. Sarkar S, Heise MT. Mouse Models as Resources for Studying Infectious Diseases.  
498 *Clinical therapeutics.* 2019;41(10):1912-22.
- 499 16. Campbell G, Hills S, Fischer M, Jacobson J, Hoke C, Hombach J, et al. Estimated global  
500 incidence of Japanese encephalitis:. *Bulletin of the World Health Organization.* 2011;89:766-74.
- 501 17. Halstead SB, Grosz CR. Subclinical Japanese encephalitis. I. Infection of Americans  
502 with limited residence in Korea. *American journal of hygiene.* 1962;75:190-201.
- 503 18. Hase T, Dubois DR, Summers PL. Comparative study of mouse brains infected with  
504 Japanese encephalitis virus by intracerebral or intraperitoneal inoculation. *International journal*  
505 *of experimental pathology.* 1990;71(6):857-69.
- 506 19. Schuh AJ, Ward MJ, Leigh Brown AJ, Barrett AD. Dynamics of the emergence and  
507 establishment of a newly dominant genotype of Japanese encephalitis virus throughout Asia. *J*  
508 *Virol.* 2014;88(8):4522-32.

509 **Supporting information captions**

510

511 **S1\_Data:** Protocol: A systematic review of mouse models of Japanese encephalitis

512

513 **S2\_Data:** R code for meta-regression analysis

514

515 **S3\_Data:** Analysis of top 6 mouse strains

516

517 **S4\_Figure:** JEV phylogenetic tree including all complete genome sequences uploaded to  
518 GenBank and partial sequences if used in studies with sequences used in studies highlighted

519

520 **S5\_Data:** Analysis of top 13 virus strain

521

522 **S6\_Figure:** Locations (countries) of included studies (12 countries, n=127)

523

524 **S7\_Figure:** Year of publication of included studies (1970-2020; n=127)

525

526 **S8\_Data:** Analysis of top 6 routes

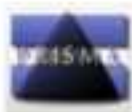

## PRISMA 2009 Flow Diagram

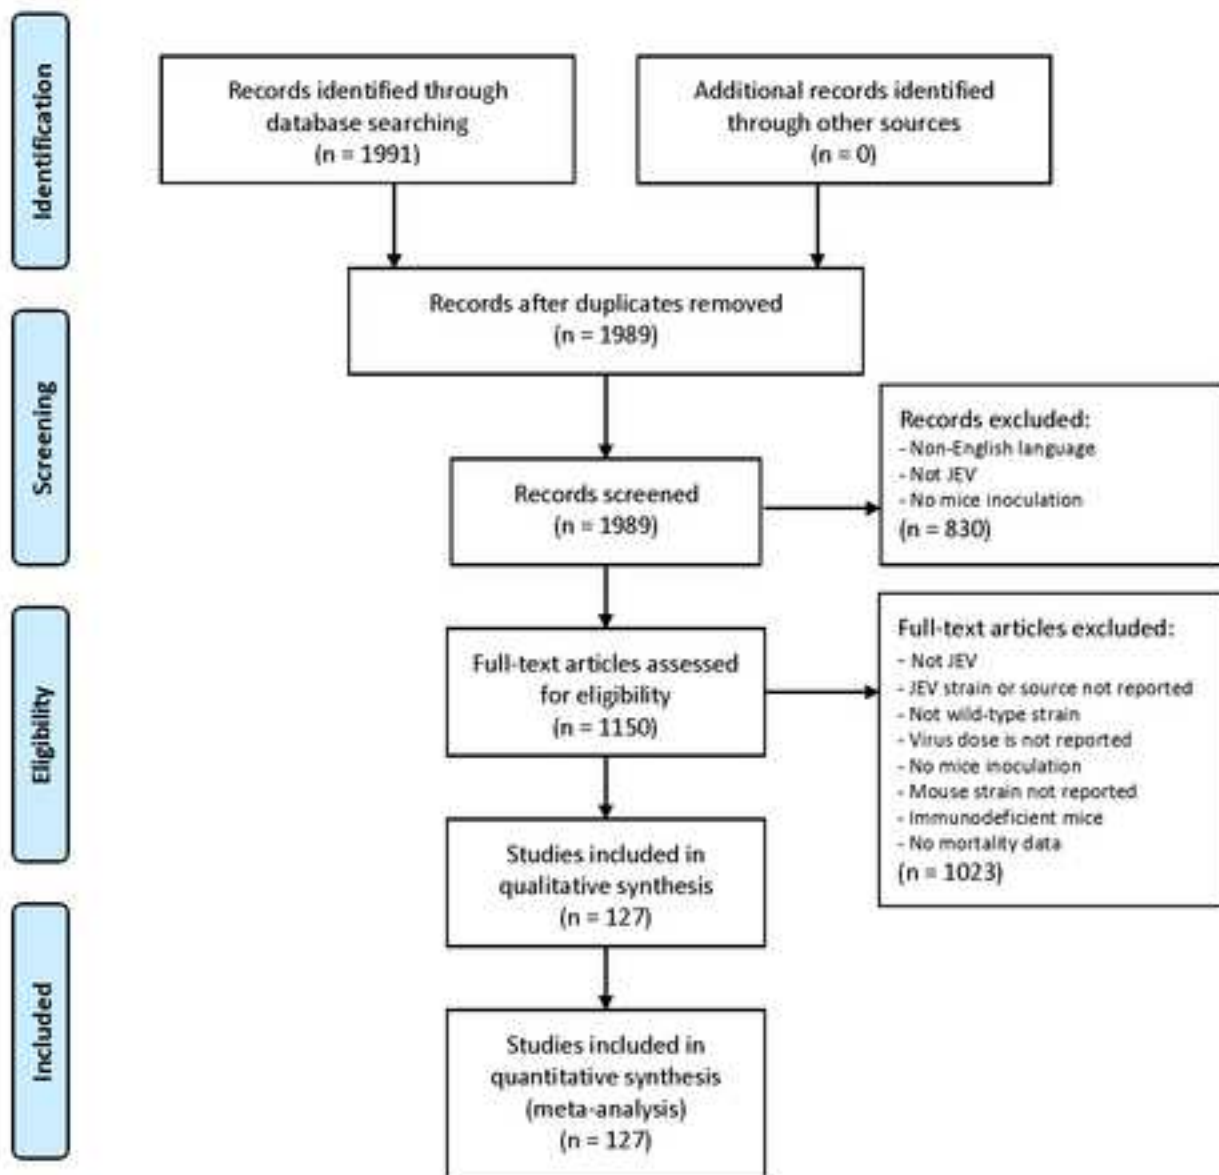

From: Moher D, Liberati A, Tetzlaff J, Altman DG, The PRISMA Group (2009). Preferred Reporting Items for Systematic Reviews and Meta-Analyses: The PRISMA Statement. PLoS Med 8(7): e1000097. doi:10.1371/journal.pmed1000097

For more information, visit [www.prisma-statement.org](http://www.prisma-statement.org).

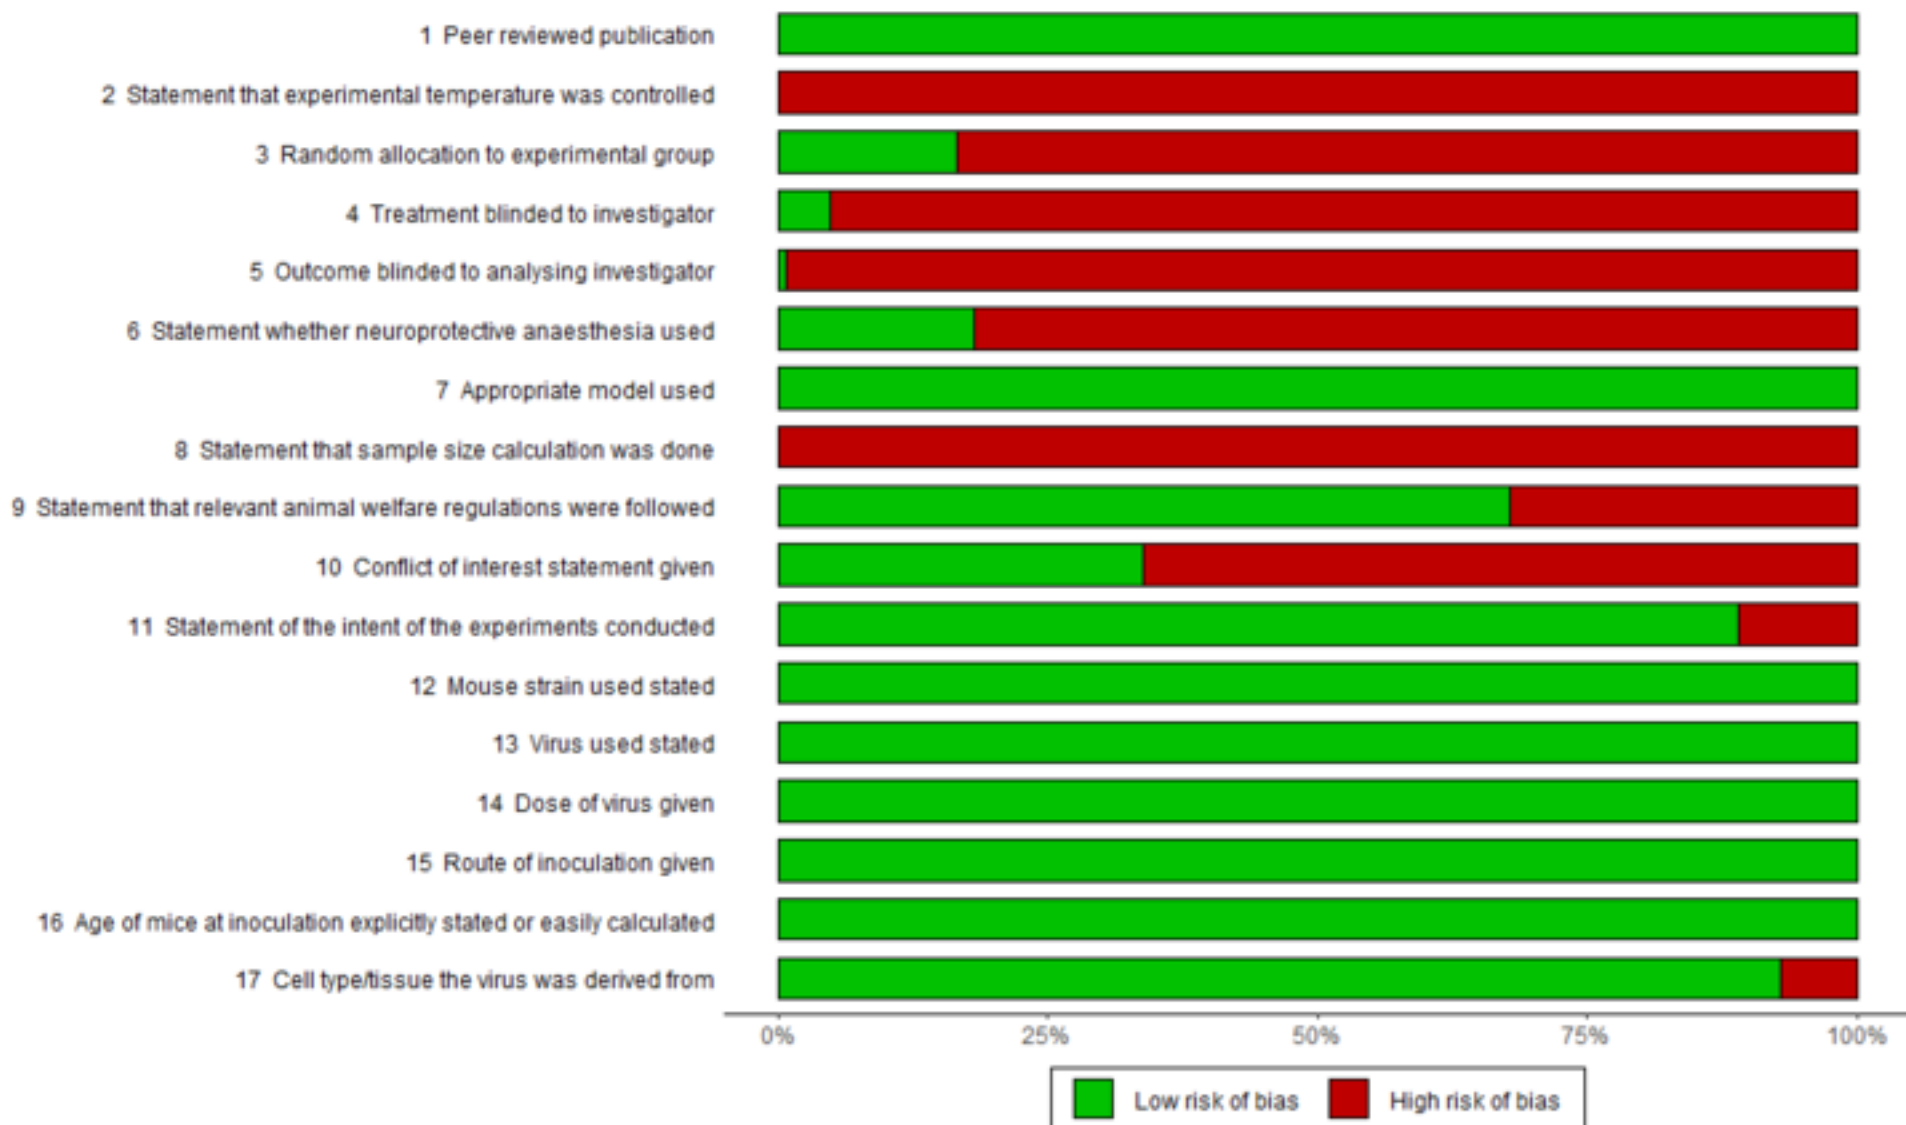

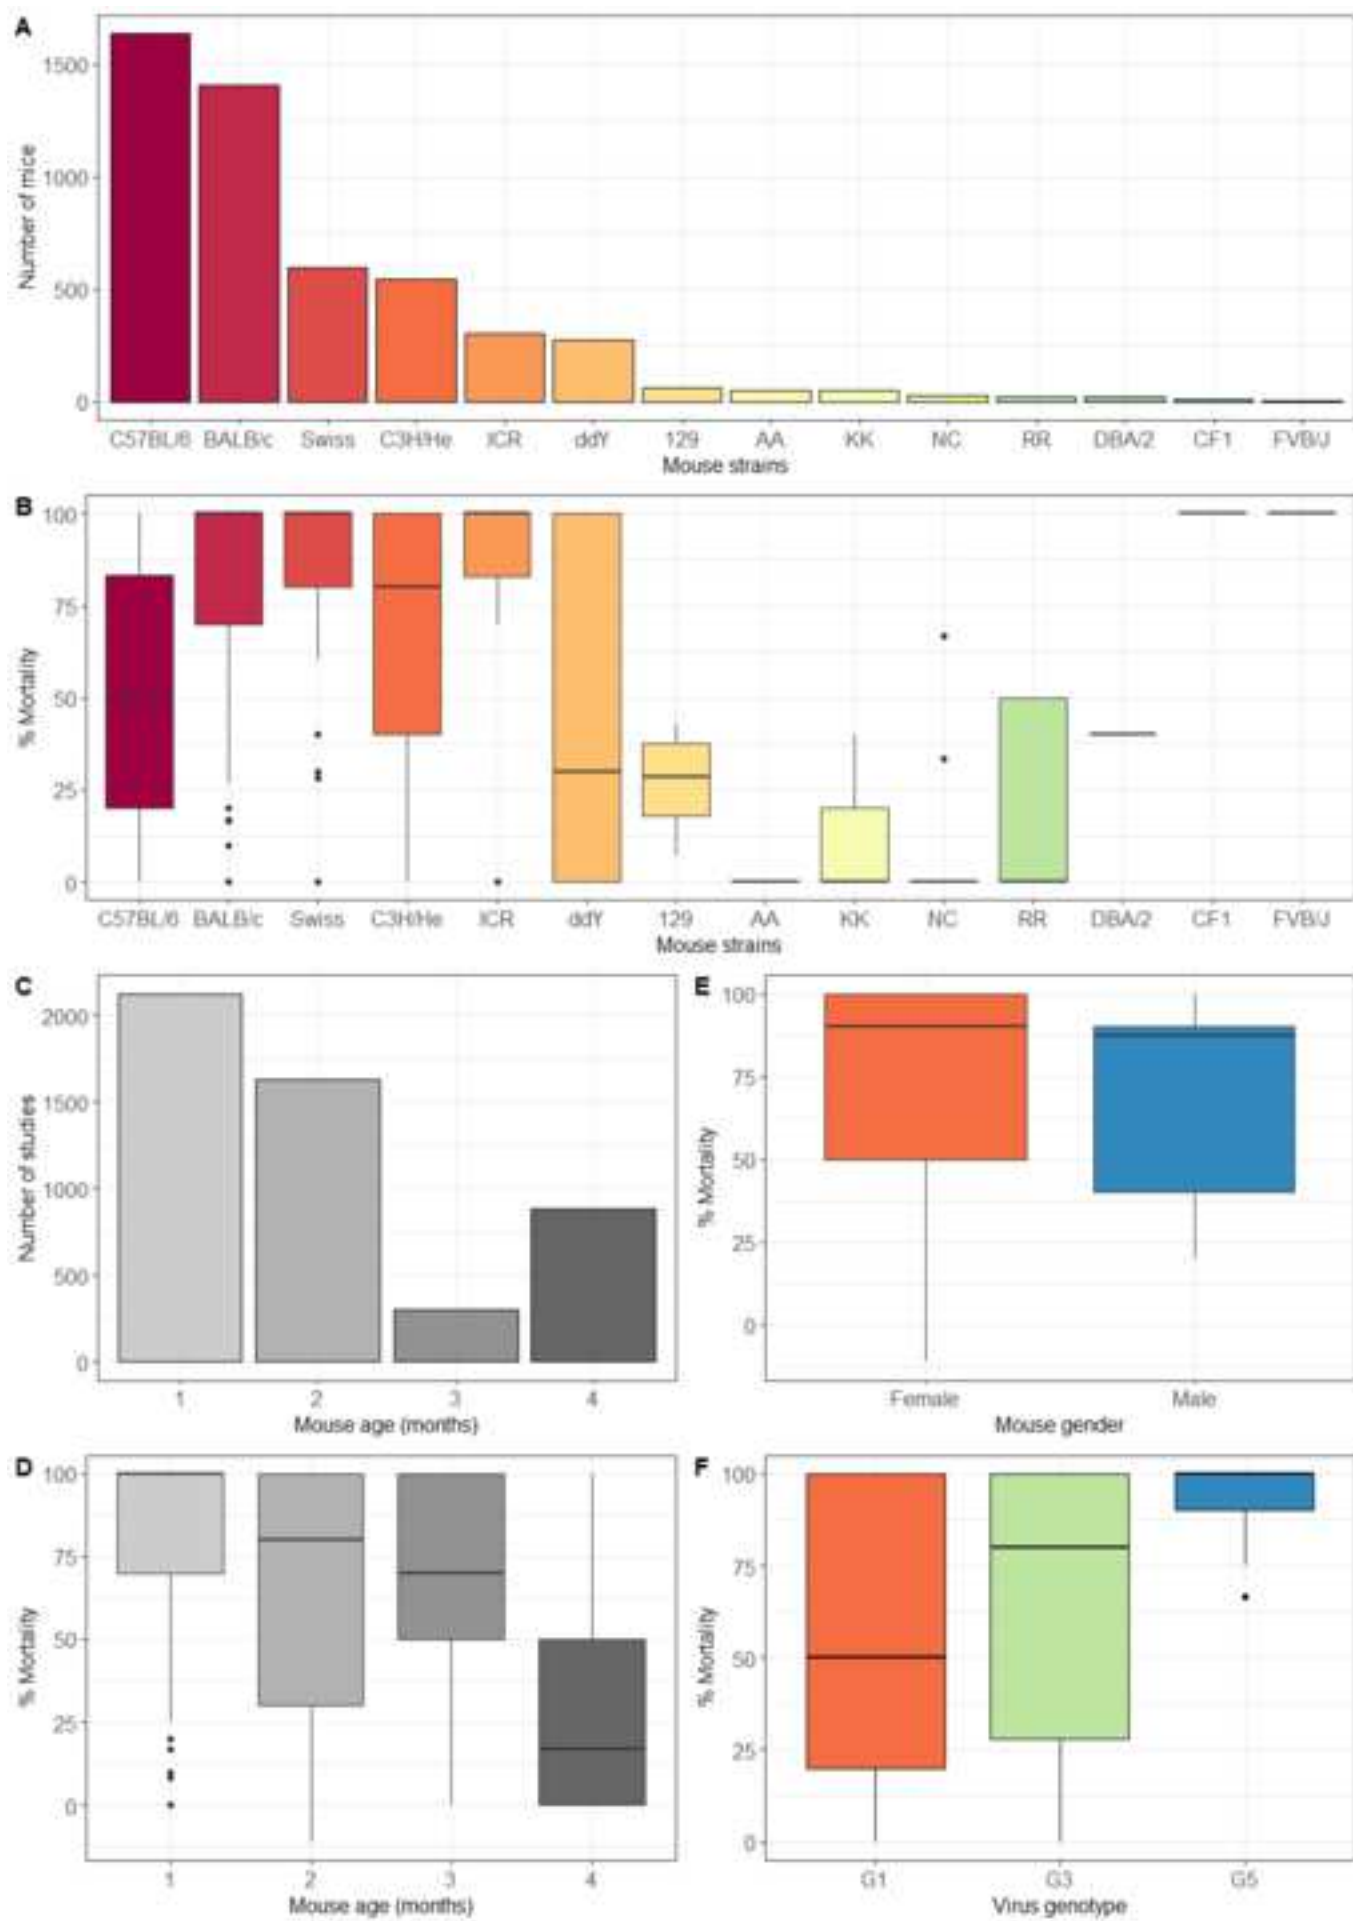

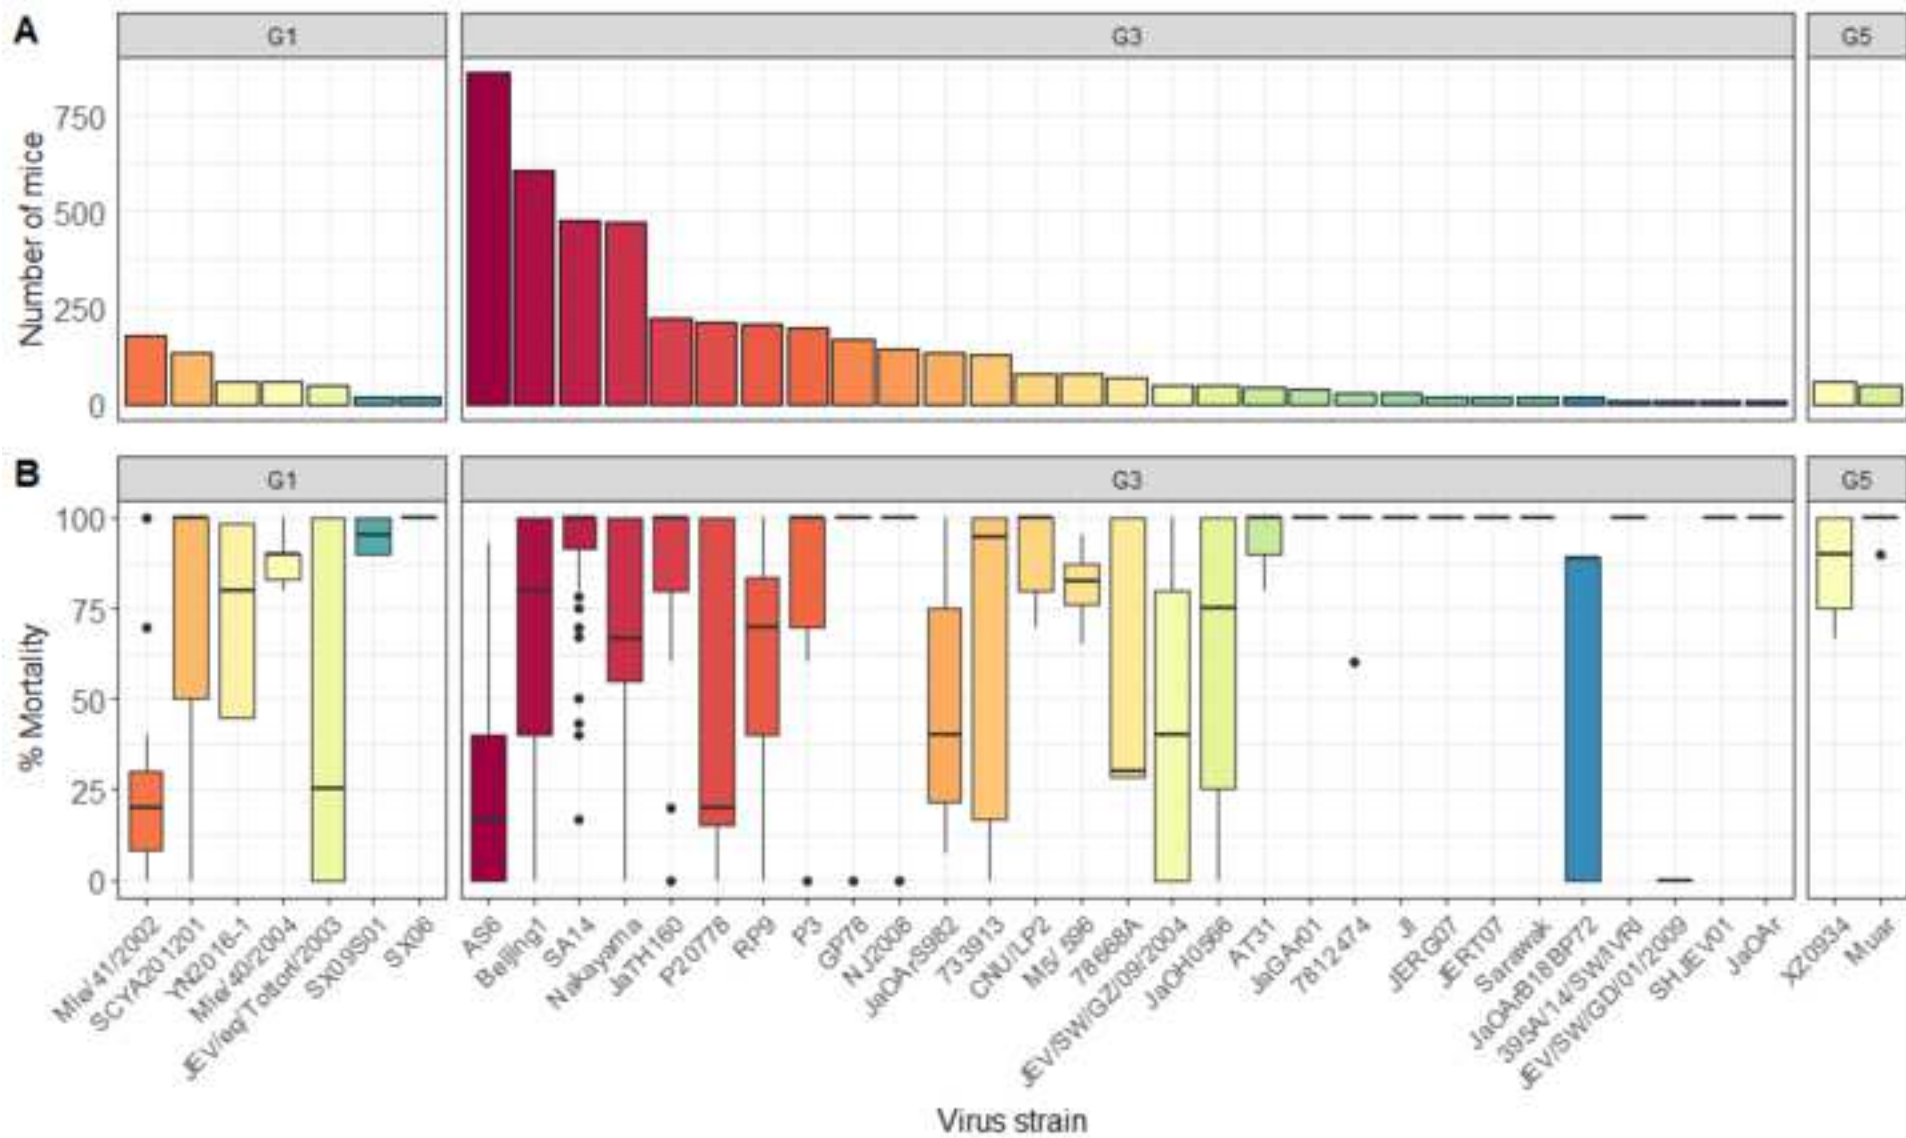

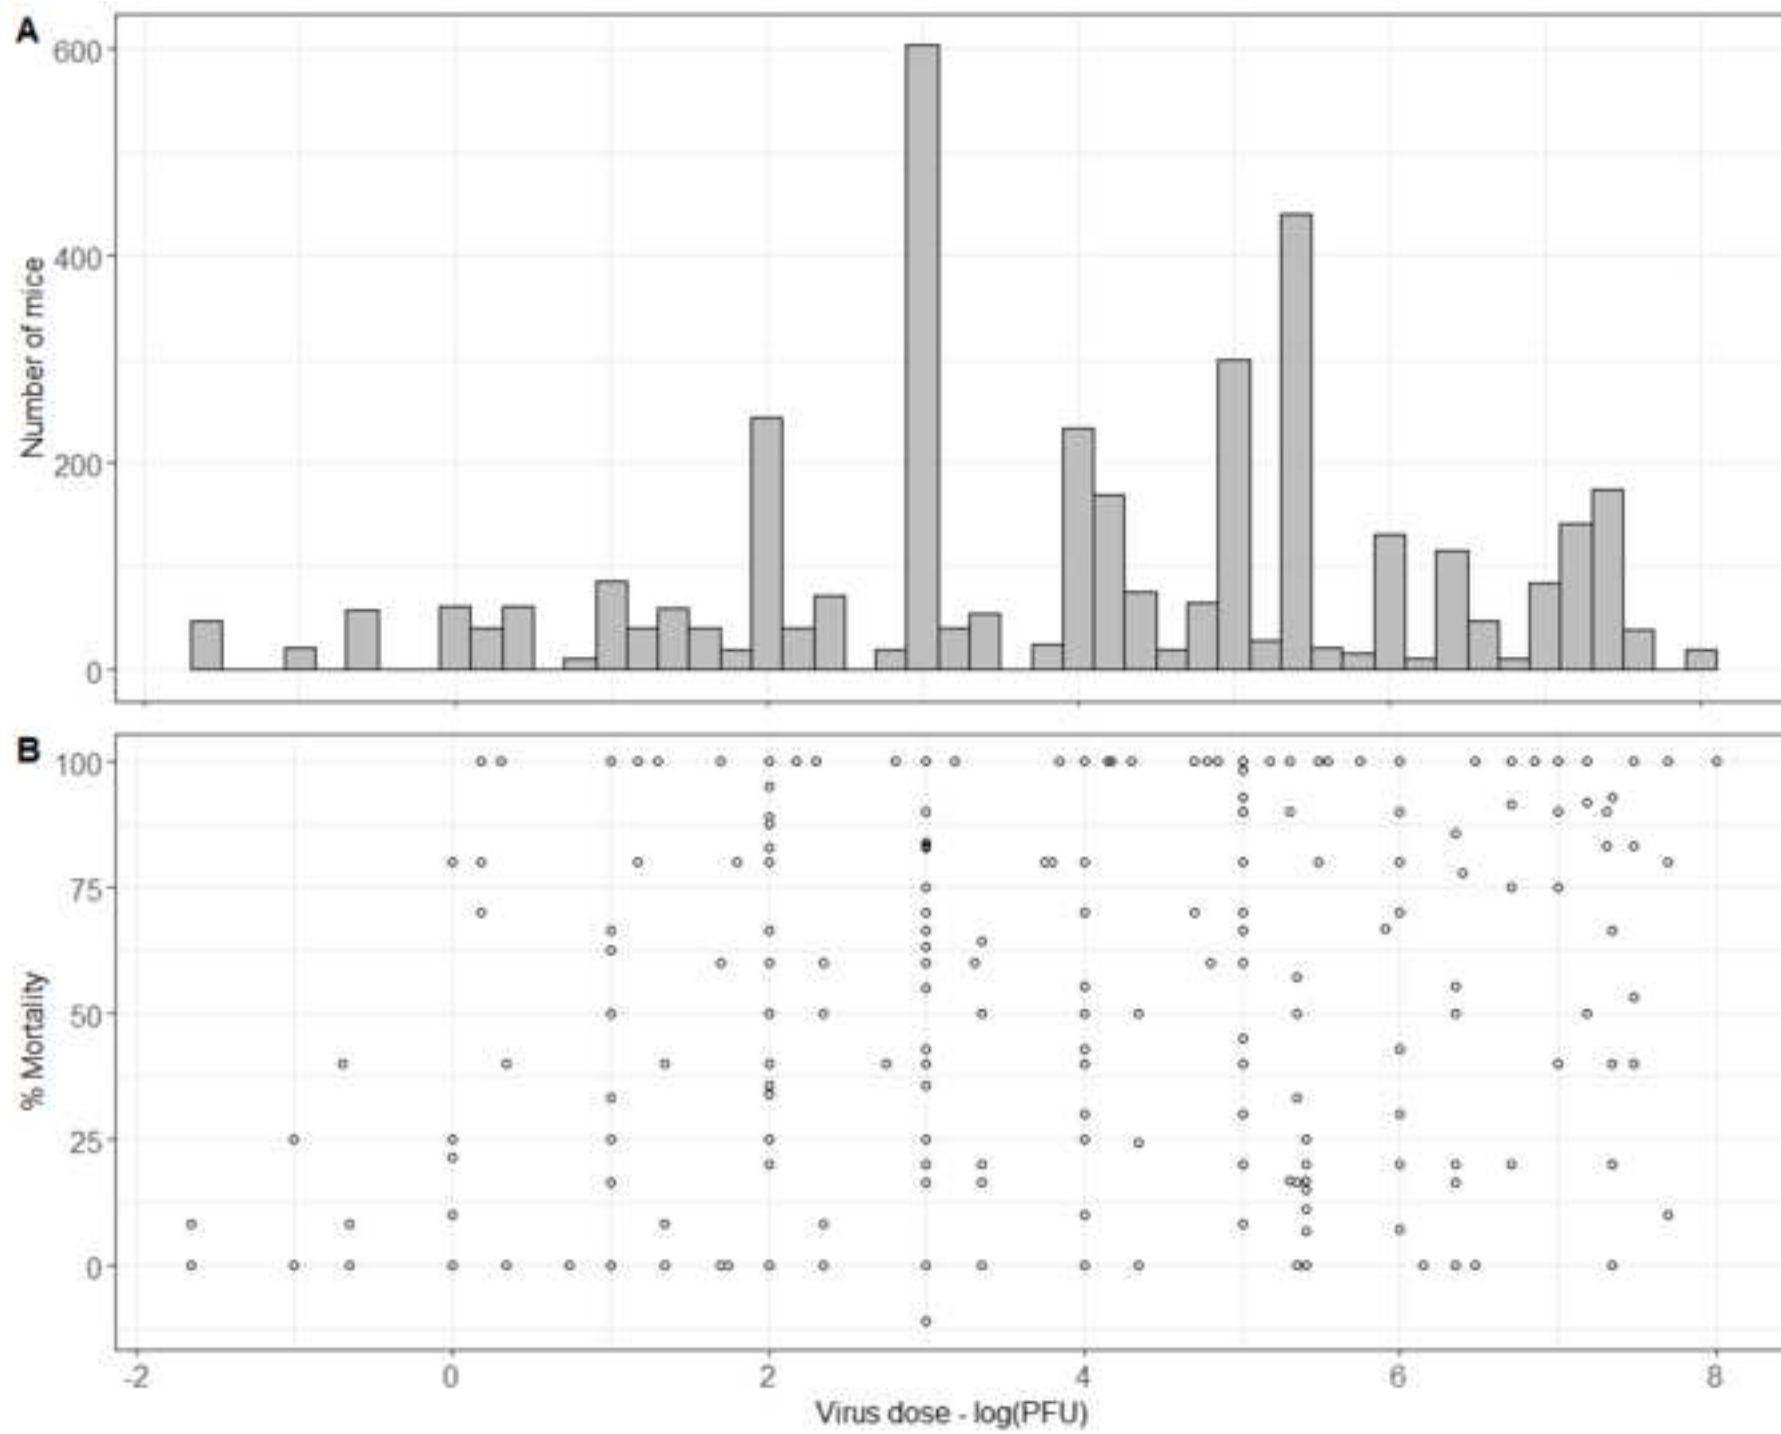



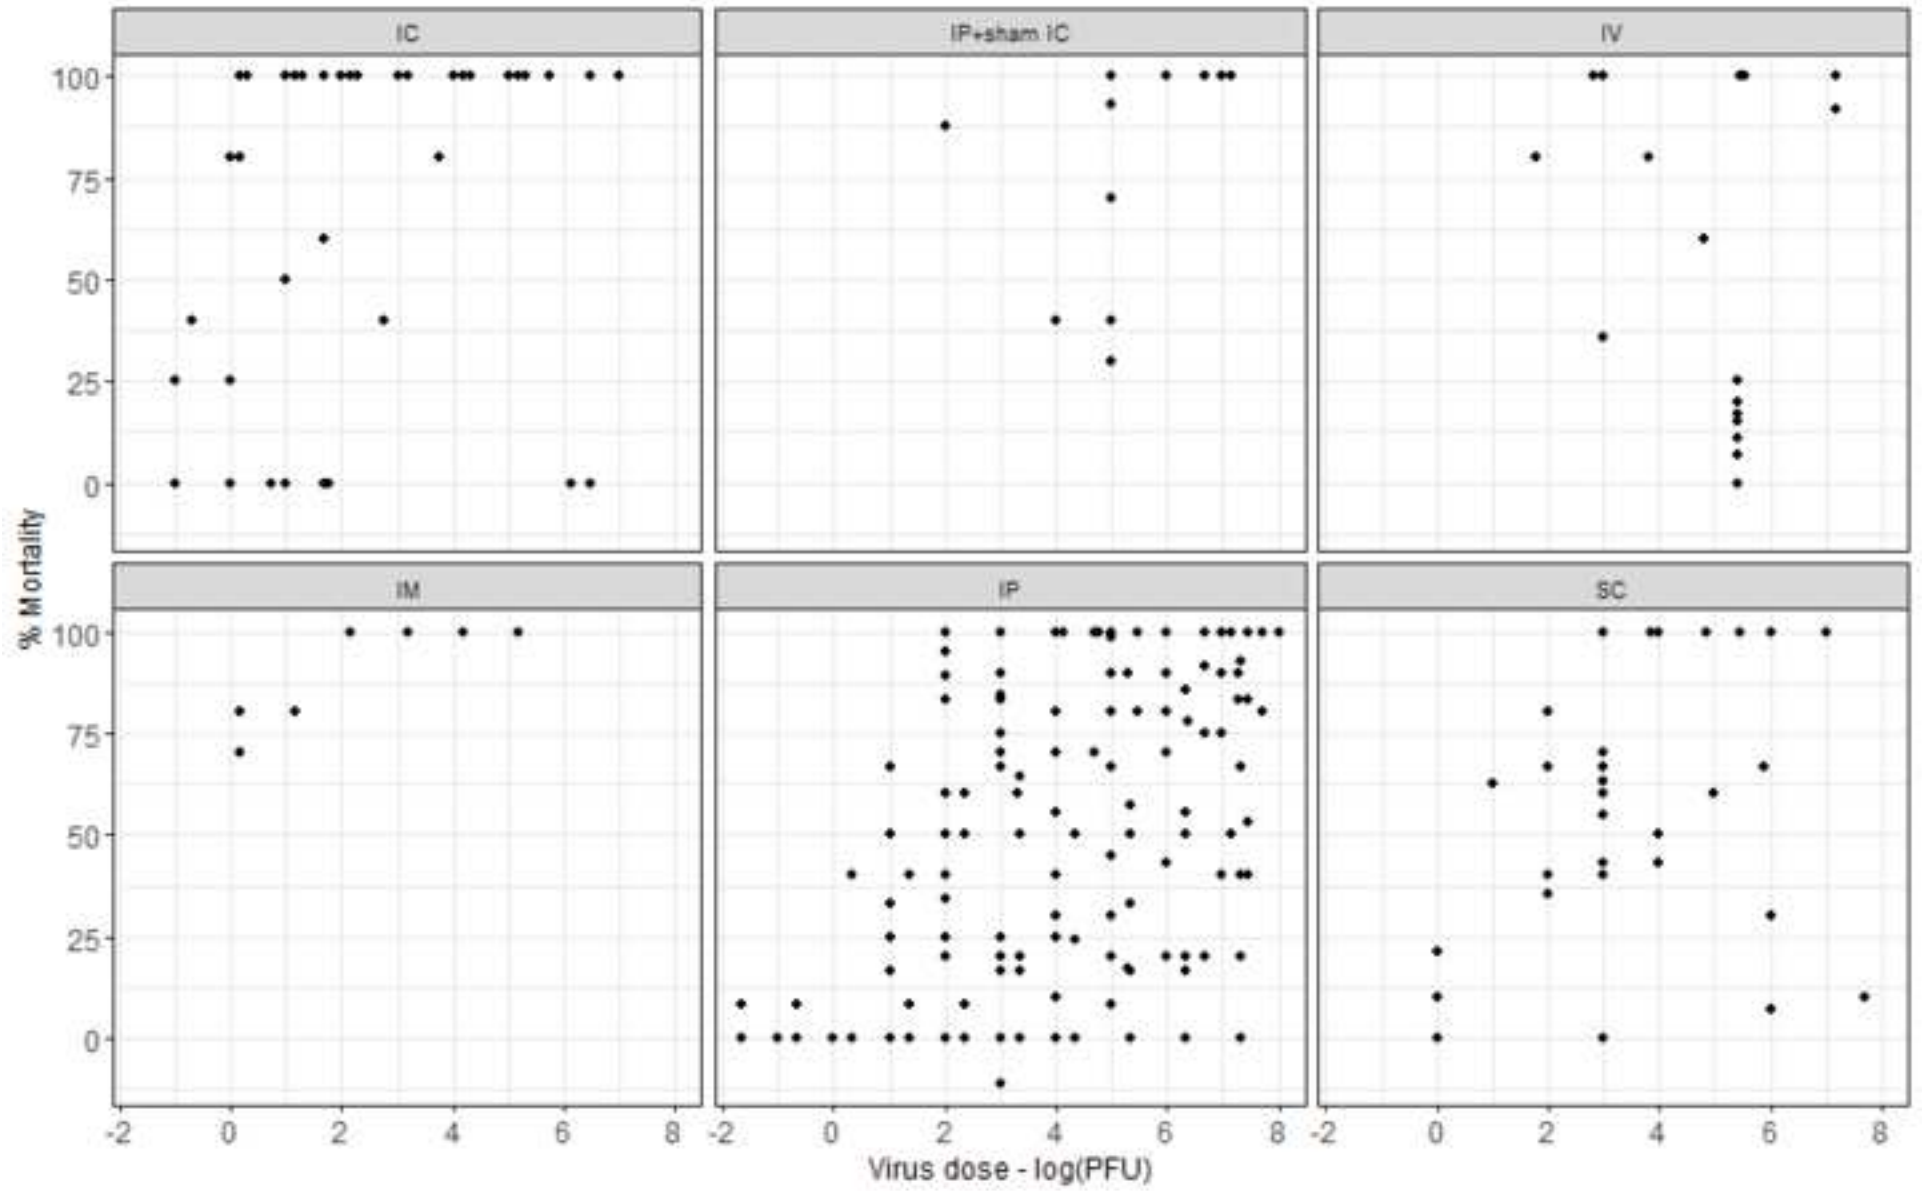

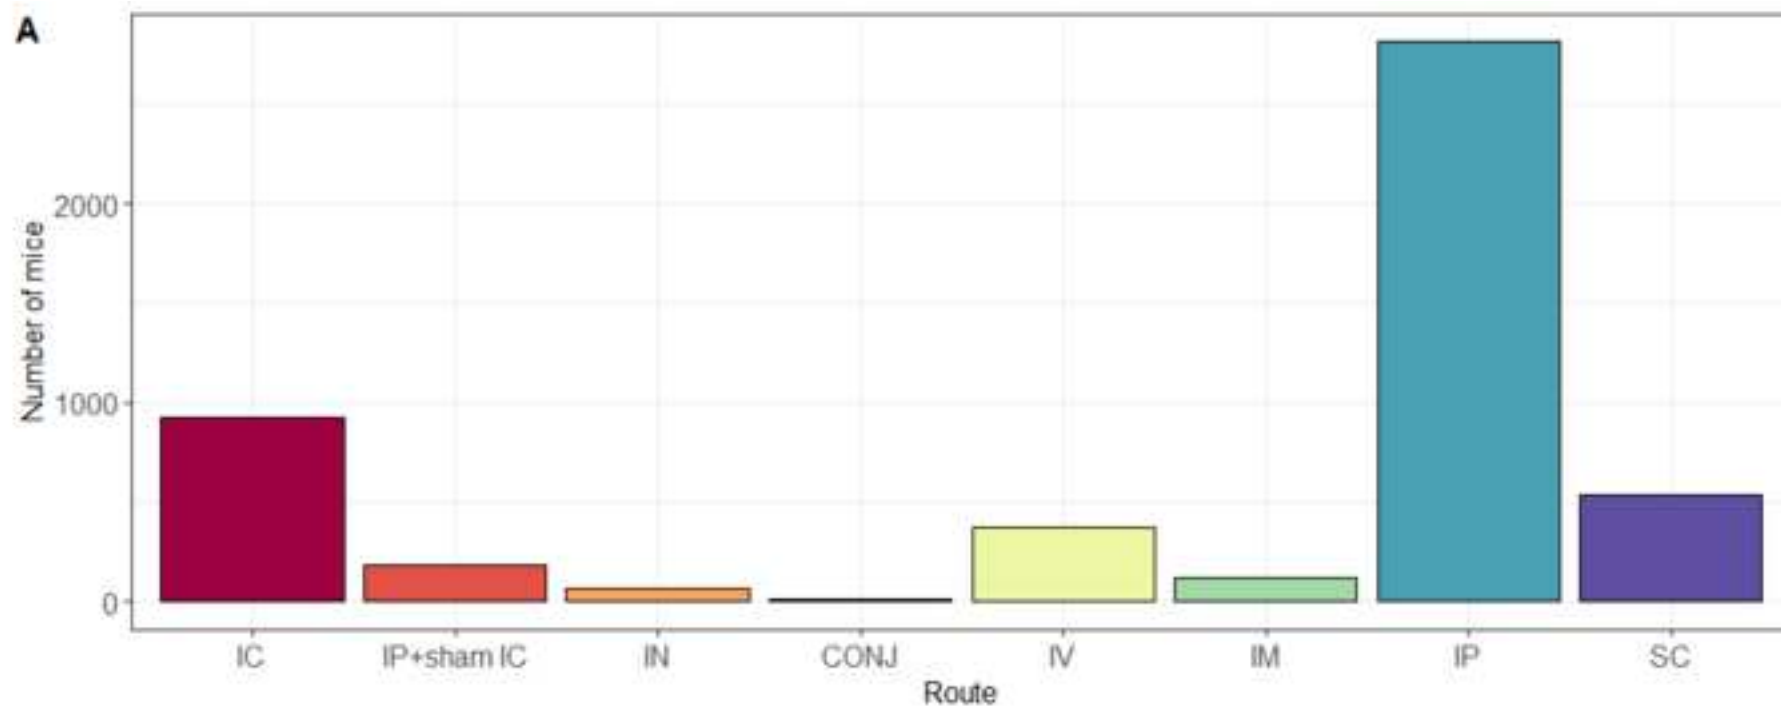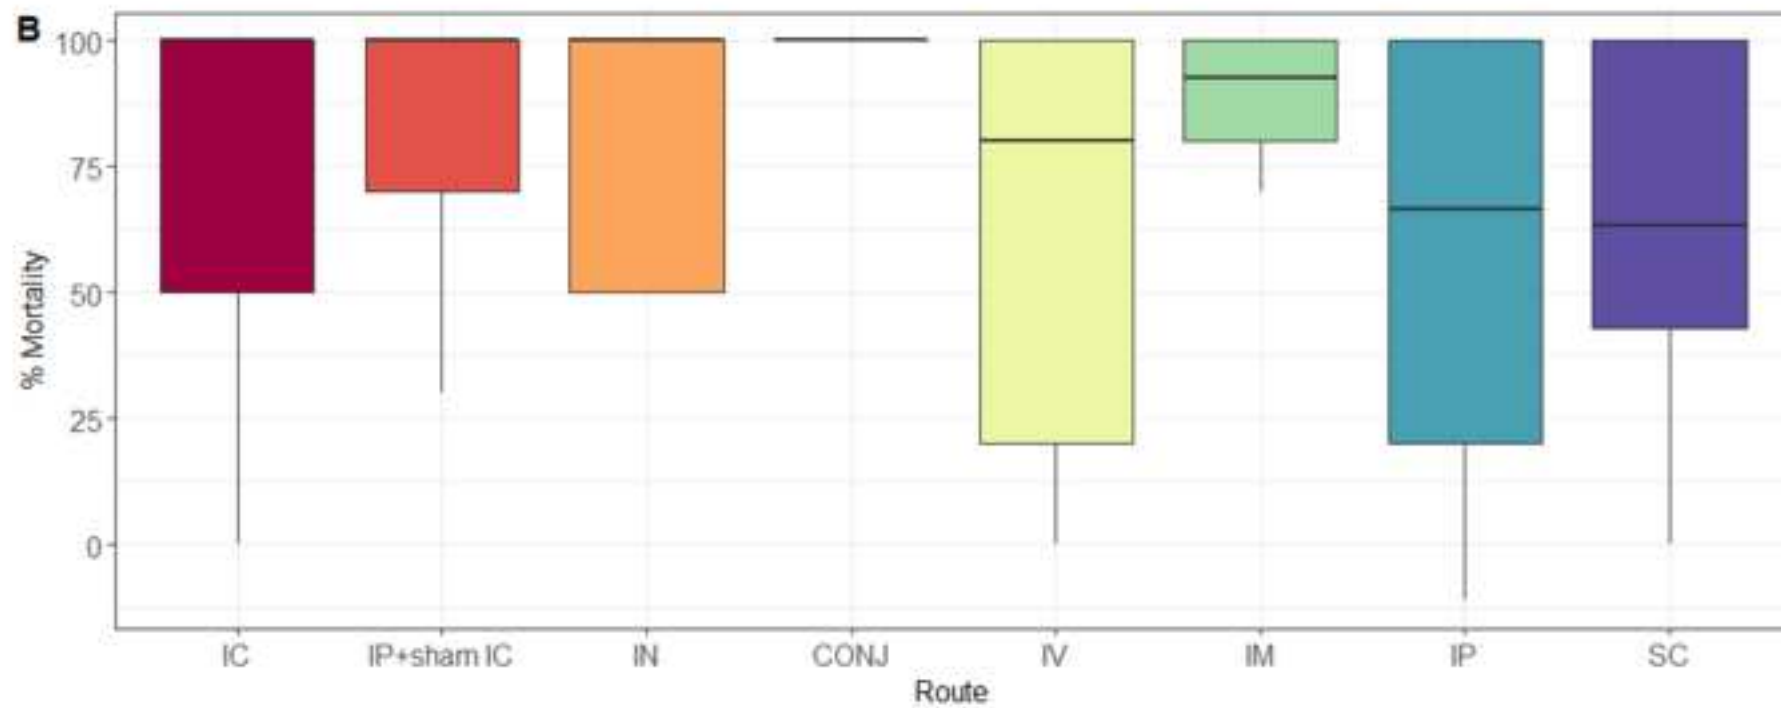

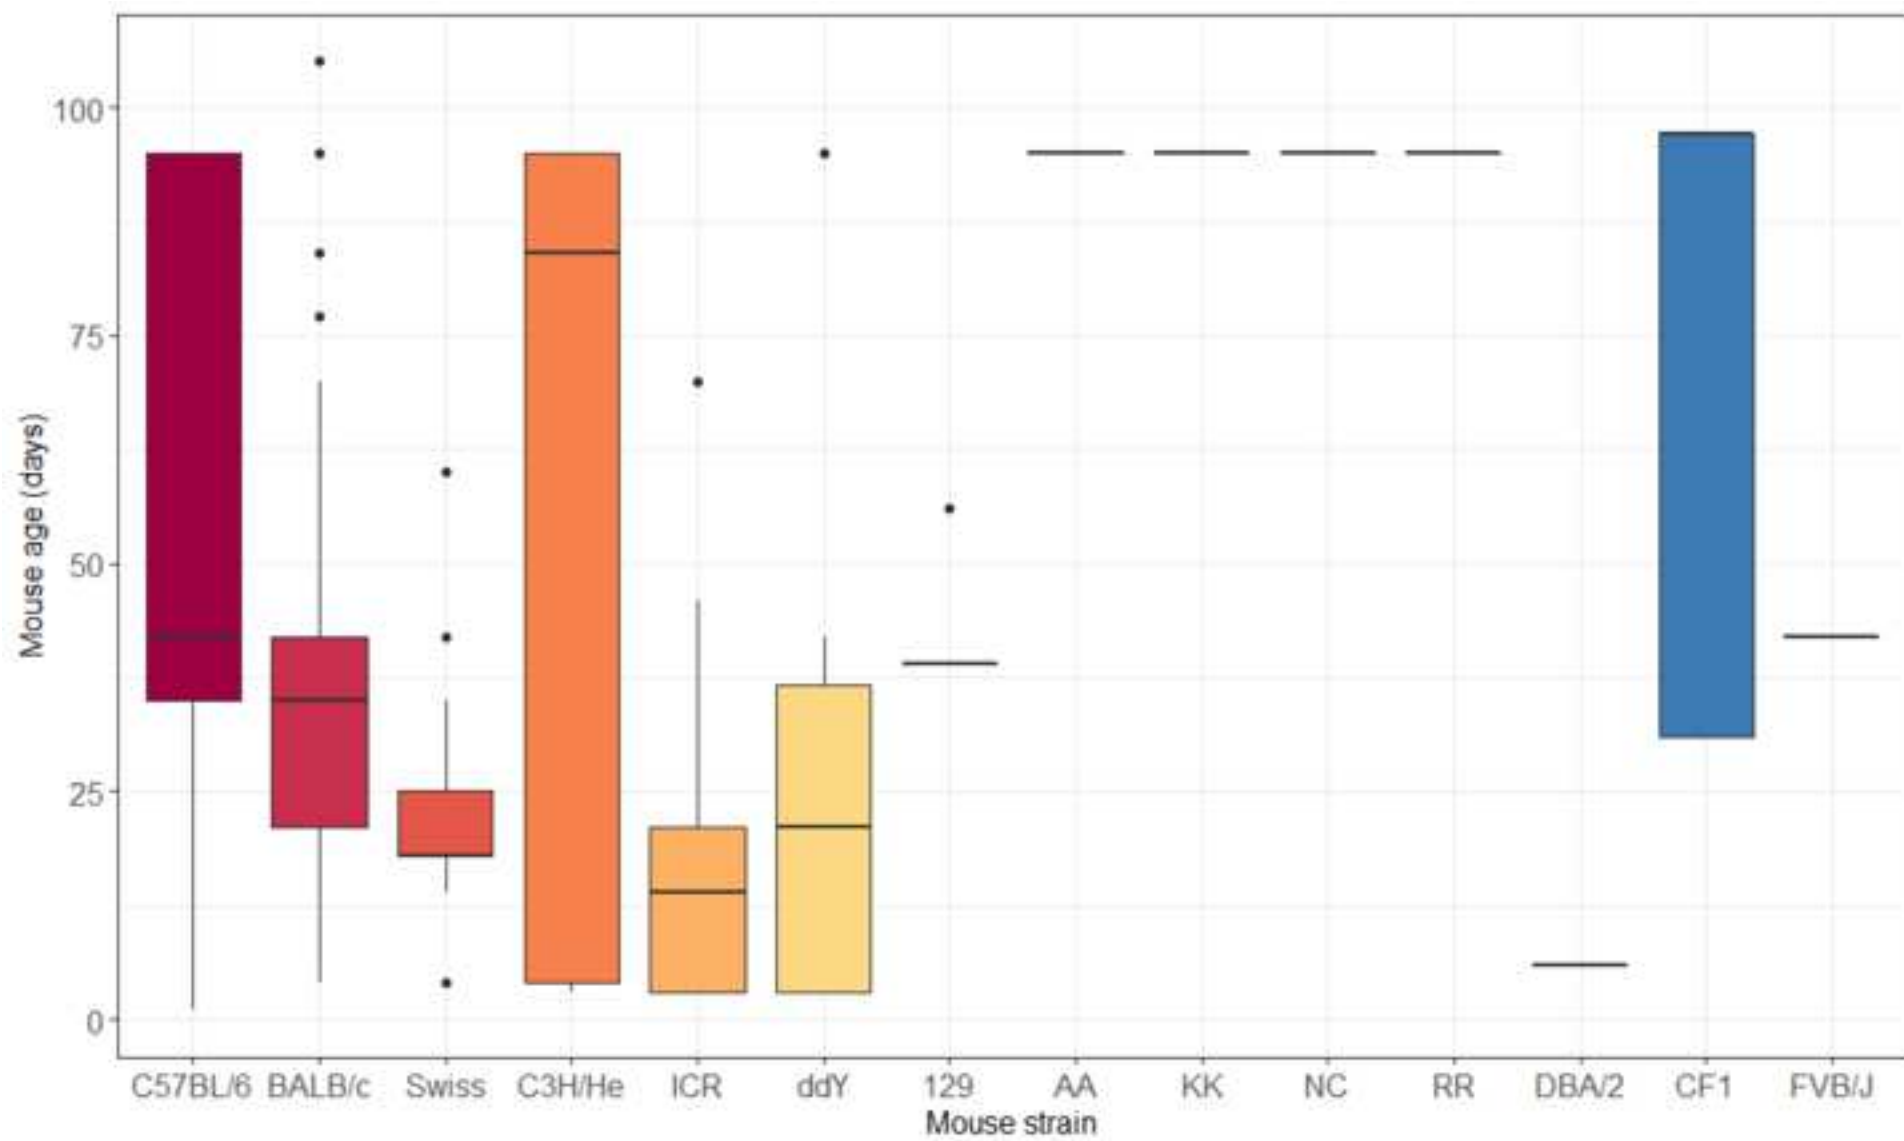

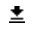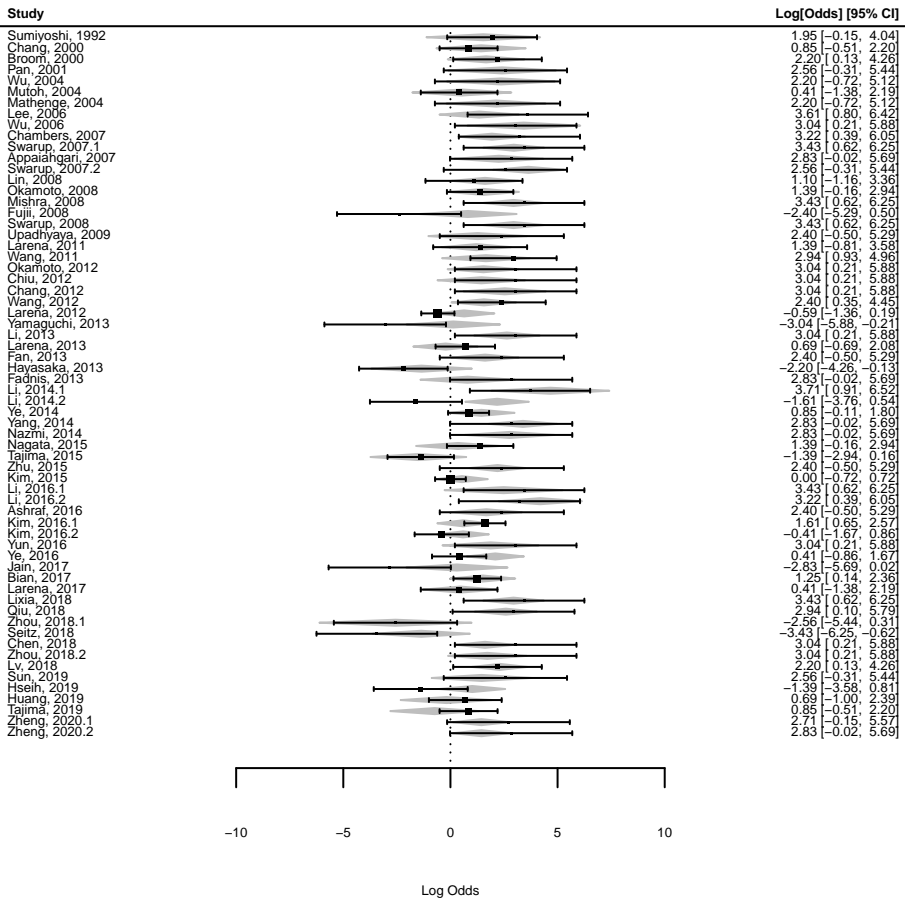

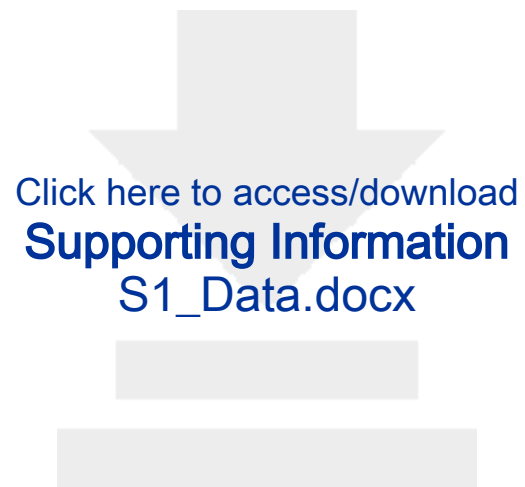

Click here to access/download  
**Supporting Information**  
S1\_Data.docx

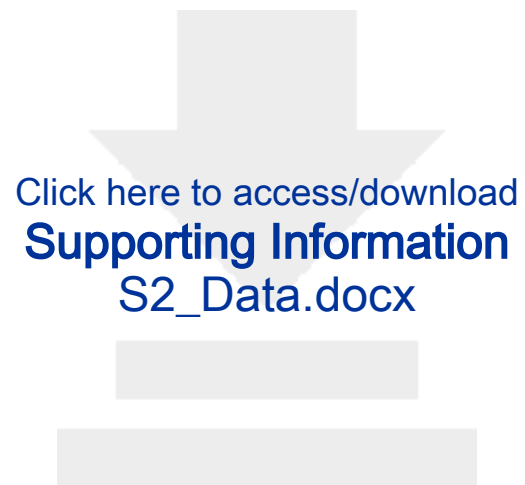

Click here to access/download  
**Supporting Information**  
S2\_Data.docx

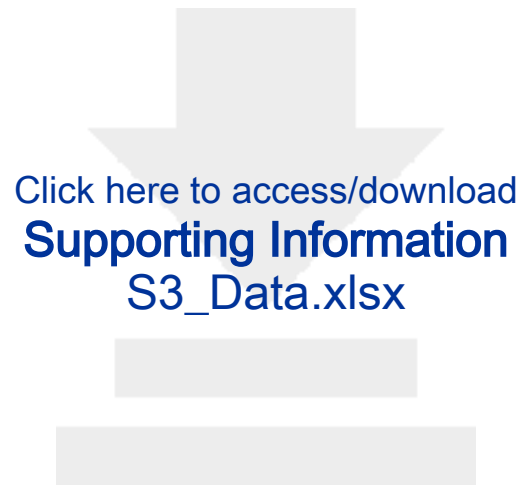

Click here to access/download  
**Supporting Information**  
S3\_Data.xlsx



Click here to access/download  
**Supporting Information**  
S4\_Figure.pdf





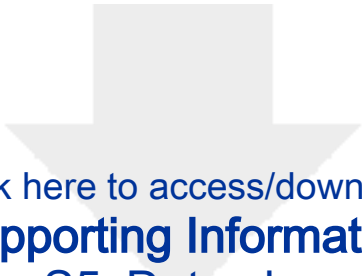

Click here to access/download  
**Supporting Information**  
S5\_Data.xlsx





Click here to access/download  
**Supporting Information**  
S6\_Figure.docx



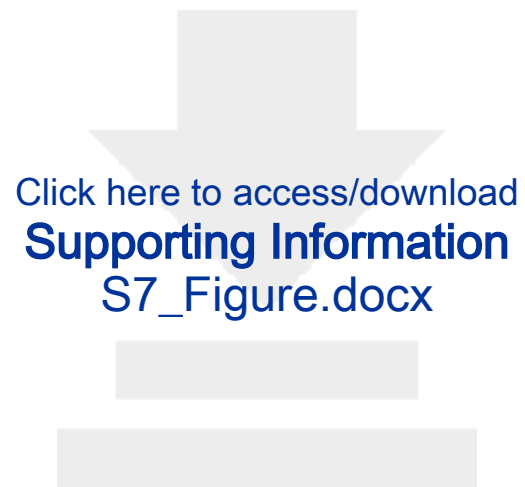

Click here to access/download  
**Supporting Information**  
S7\_Figure.docx

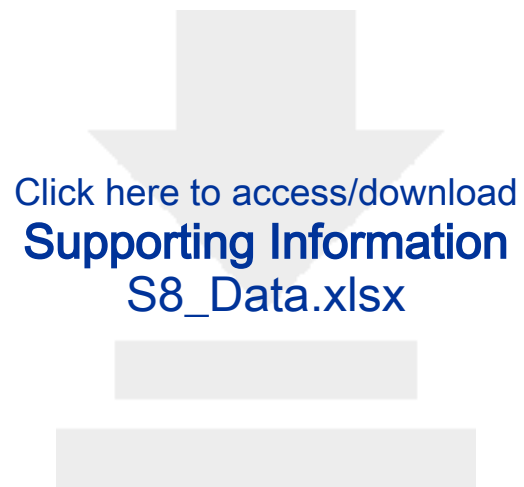

Click here to access/download  
**Supporting Information**  
S8\_Data.xlsx

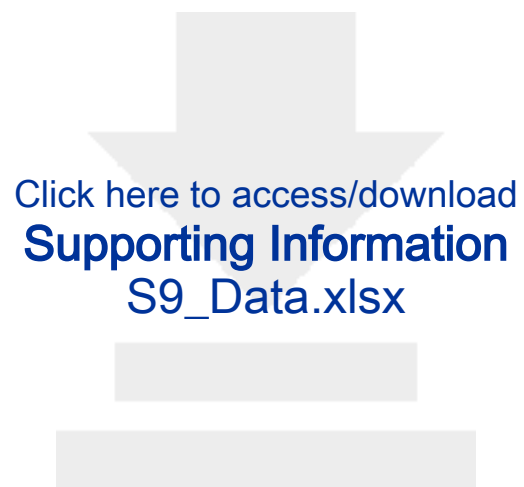

Click here to access/download  
**Supporting Information**  
S9\_Data.xlsx
